# 1 **Multimodal cell tracking from systemic administration to tumour** 2 **growth by combining gold nanorods and reporter genes**

3

4 Joan Comenge<sup>1</sup>, Jack Sharkey<sup>2,3</sup>, Oihane Fragueiro<sup>4</sup>, Bettina Wilm<sup>2,3</sup>, Mathias Brust<sup>4</sup>, Patricia  
5 Murray<sup>2,3</sup>, Raphaël Lévy<sup>1\*</sup>, Antonius Plagge<sup>2,3\*</sup>

6

7 <sup>1</sup> Institute of Integrative Biology, <sup>2</sup> Department of Cellular and Molecular Physiology, <sup>3</sup> Centre  
8 for Preclinical Imaging, Institute of Translational Medicine, <sup>4</sup> Department of Chemistry,  
9 University of Liverpool, Liverpool, UK

10 Correspondence should be addressed to: [rapha@liverpool.ac.uk](mailto:rapha@liverpool.ac.uk), [plagge@liverpool.ac.uk](mailto:plagge@liverpool.ac.uk)

11 \* Authors contributed equally to the work.

12

13 ABSTRACT

14 Understanding the fate of exogenous cells after implantation is important for clinical  
15 applications. Preclinical studies allow imaging of cell location and survival. Labelling with  
16 nanoparticles enables high sensitivity detection, but cell division and cell death cause signal  
17 dilution and false positives. By contrast, genetic reporter signals are amplified by cell  
18 division. Here we characterise lentivirus-based bi-cistronic reporter gene vectors and silica-  
19 coated gold nanorods (GNRs) as synergistic tools for cell labelling and tracking. Co-  
20 expression of the bioluminescence reporter luciferase and the optoacoustic reporter near-  
21 infrared fluorescent protein iRFP720 enabled cell tracking over time in mice. Multispectral  
22 optoacoustic tomography (MSOT) showed immediate biodistribution of GNR-labelled cells  
23 after intracardiac injection and successive clearance of GNRs (day 1-15) with high resolution,  
24 while optoacoustic iRFP720 detection indicated tumour growth (day 10-40). This multimodal  
25 cell tracking approach could be applied widely for cancer and regenerative medicine  
26 research to monitor short- and long-term biodistribution, tumour formation and metastasis.

27

28

.....

## 1 Introduction

2 Non-invasive optical imaging methods for preclinical *in vivo* research include  
3 bioluminescence (BLI) and fluorescence as well as photoacoustic/optoacoustic tomography,  
4 a technology that has only been developed recently<sup>1-3</sup>. These imaging modalities have  
5 enabled great progress in the tracking of labelled cells longitudinally over time in animal  
6 models of disease, which has become especially relevant for cancer research and cell-based  
7 regenerative medicine therapies<sup>4-6</sup>. The resolution and sensitivity of optical imaging in  
8 animals is limited by autofluorescence, absorption and scattering of excitation and/or  
9 emission light, especially in deep tissues. The optimal window for *in vivo* optical imaging lies  
10 in the near infrared (NIR) spectrum (~650–900 nm), since absorption through the main  
11 endogenous chromophores (oxy-haemoglobin, deoxy-haemoglobin, melanin, water and  
12 lipids) are minimal in this spectral range<sup>3</sup>. For permanent cell labelling and tracking, genetic  
13 modification with reporter genes is the method of choice, although fluorescent tags and  
14 nanoparticles have been developed recently for sensitive short-term cell tracking over a  
15 period of a few cell divisions<sup>7,8</sup>.

16  
17 Using luciferase reporter genes, bioluminescence constitutes the most sensitive optical  
18 modality due to its excellent signal-to-noise ratio, as light emission only occurs in the  
19 presence of a functional enzyme and its required co-factors. Firefly luciferase has become  
20 the most widely used reporter as its substrates, D-luciferin or CycLuc1<sup>9</sup>, are very well  
21 tolerated by animals and, compared to other luciferases, its peak light emission at around  
22 562 nm is closest to the infrared window for *in vivo* imaging<sup>4</sup>. Although highly sensitive *in*  
23 *in vivo* cell tracking via bioluminescence imaging of firefly luciferase is well established<sup>4,10</sup>, this  
24 modality provides poor information about the spatial localisation of cells. Fluorescence has  
25 recently gained importance for animal imaging, since novel near-infrared fluorescent  
26 proteins (iRFPs) were developed from bacterial phytochrome photoreceptors<sup>11,12</sup>. Similar to  
27 bioluminescence imaging, fluorescence only allows limited spatial resolution due to the high  
28 scattering coefficient of photons in tissues.

29  
30 On the other hand, photoacoustic imaging is based on the generation of ultrasound waves  
31 after absorption of light emitted by a pulsed laser. The sound waves are well transmitted in

1 fluid media and less prone to scattering through tissues than emitted light. In fact, acoustic  
2 scattering is three orders of magnitude less than photon scattering<sup>13</sup>, which overcomes  
3 deep tissue spatial resolution drawbacks of other optical-based imaging technologies.  
4 Interestingly, some iRFPs, such as iRFP720, have an absorption profile in the NIR window,  
5 thus enabling their use as reporter genes for photoacoustic imaging, and allowing deep  
6 tissue imaging and tumour monitoring in mice<sup>1,14</sup>. For example, new iRFPs have been  
7 proven to be useful genetic photoacoustic reporters in mammary gland and brain tumour  
8 monitoring, which establishes them as dual-modality imaging probes<sup>1,15,16</sup>. In addition, in  
9 multispectral optoacoustic tomography (MSOT), a rapid multiwavelength excitation allows  
10 the distinction between different absorbers simultaneously after applying multispectral  
11 unmixing algorithms<sup>17</sup>. Hence, a number of endogenous (e.g. deoxy- and oxyhaemoglobin)  
12 or exogenously introduced targets can be imaged *in vivo* via MSOT, including fluorescent  
13 proteins and nanoparticles.

14

15 Since light absorption triggers the photoacoustic response, contrast agents with a high  
16 molar extinction coefficient facilitate their distinction from endogenous chromophores. In  
17 this regard, GNRs are an attractive choice since the extinction coefficients are in the range  
18 of  $4$  to  $5.5 \times 10^9 \text{ M}^{-1}\text{cm}^{-1}$  for longitudinal surface plasmon between 728 and 845 nm<sup>18</sup>, i.e.  
19 orders of magnitude higher than endogenous absorbers or other types of contrast agents  
20 (e.g. AlexaFluor750 and iRFP720 coefficients are  $2.5 \times 10^5$  and  $9.6 \times 10^4 \text{ M}^{-1}\text{cm}^{-1}$ , respectively  
21<sup>12,19</sup>). We recently demonstrated how, after coating GNRs with a 35 nm silica shell, the  
22 optical properties of GNRs are maintained even in harsh environments such as the  
23 endosomal vesicles<sup>7</sup>. This enabled very sensitive photoacoustic imaging of labelled cells,  
24 pushing the limits of detection into a range useful for biologically-relevant applications  
25 including cell tracking. However, cell division and cell death result in a decrease of GNR  
26 concentration and therefore a decrease of photoacoustic intensity. Thus, for long-term  
27 photoacoustic tracking of cells, adequate reporter genes are required.

28

29 Here we characterise newly generated lentivirus-based bi-cistronic reporter gene vectors  
30 and silica-coated GNRs as synergistic tools for co-labelling of cells and tracking in multiple  
31 imaging modalities at different stages after cell administration. The GNR-860 offered an  
32 excellent photoacoustic sensitivity that enabled detection of a very low number of cells.

1 Reporter gene vectors mediated co-expression of the most sensitive bioluminescent  
2 reporter, firefly luciferase, and the most red-shifted near-infrared fluorescent protein,  
3 iRFP720, which also acted as a photoacoustic reporter in MSOT. Whilst GNR-860 enabled  
4 early detection of cells by photoacoustic imaging after systemic injection, reporter genes  
5 were needed to monitor any potential tumour growth with the same technique. In addition,  
6 co-expression of luciferase allowed bioluminescence imaging. Although this modality does  
7 not offer the spatial resolution of photoacoustic imaging, it was used here to continuously  
8 monitor cell viability as well as for validating the results of photoacoustic tomography. The  
9 combination of the two cell labelling strategies (nanoparticles and genetic labelling) allowed  
10 short-term and long-term multimodal imaging of deep tissues with high spatial resolution  
11 without compromising sensitivity. It enabled the non-invasive monitoring of the initial cell  
12 biodistribution on a sub-organ level as well as the detection of tumour formation from very  
13 early stages, thus opening opportunities for gaining a better understanding of stem cell  
14 therapies safety required for moving towards clinical translation<sup>20</sup>.

15

## 16 **Methods**

17 **Reagents.** The following chemicals were purchased from Sigma-Aldrich (Gillingham, UK).  
18  $\text{HAuCl}_4 \cdot 3\text{H}_2\text{O}$  (>99.0%),  $\text{NaBH}_4$  (>99.99%),  $\text{AgNO}_3$  (99.0%), hexadecyltrimethylammonium  
19 bromide (CTAB, >99%), L-ascorbic acid (reagent grade), tetraethyl orthosilicate (TEOS,  
20 99.999%), O-[2-(3-Mercaptopropionylamino)ethyl]-O'-methylpolyethylene glycol (mPEG-SH,  
21 MW: 5000 Da), 5-bromosalicylic acid. Monocarboxy (1-mercaptoundec-11-yl) hexaethylene  
22 glycol (PEG-COOH, MW 526.73 Da) was obtained from Prochimia (Sopot, Poland).  
23 Dulbecco's modified eagle's medium (DMEM), phosphate buffered saline (PBS),  
24 penicillin-streptomycin, biliverdin and polybrene were also obtained from Sigma Aldrich.  
25 Foetal bovine serum (FBS) was purchased from Life-Technologies. D-Luciferin was purchased  
26 from Promega (Southampton, UK) and CycLuc1 from Glix Laboratories (Southborough,  
27 USA).

28 **Gold nanorod synthesis.** GNR synthesis were based on previously published protocols<sup>21,22</sup>.  
29 First, seeds were prepared by adding 0.6 mL of ice-cold  $\text{NaBH}_4$  (0.01 M) to a mixture of 5 mL  
30 CTAB (0.2 M) and 5 mL of  $\text{HAuCl}_4$  (0.5 mM) under vigorous stirring. The growth solution for  
31 GNR-710 was prepared by mixing 50 mL of CTAB (0.2M), 1.8 mL of  $\text{AgNO}_3$  (4 mM), 50 mL of

1 HAuCl<sub>4</sub> (1 mM) and 0.8 mL of ascorbic acid (0.1 M). Finally, 0.2 mL of freshly synthesised  
2 seeds was added to the growth solution. The reaction was kept in a water bath at 28°C for 3  
3 h. The growth solution for GNR-860 was prepared by adding 440 mg of 5-bromosalicylic acid  
4 to 100 mL of CTAB (0.1 M) and heat up the mixture to 60°C. After cooling down the solution  
5 to 30°C, 4.8 mL of AgNO<sub>3</sub> (4 mM) were added and left undisturbed for 15 min. Then, 50 mL  
6 of HAuCl<sub>4</sub> (1 mM) were added and left under low stirring for 15 min at 30°C. Afterwards, 256  
7 µL of ascorbic acid was added under vigorous agitation for 30 s. Finally, 160 µL of seeds  
8 were added and the solution was kept at 28°C for 12 h.

9 GNRs were visualized using a Tecnai G3 Spirit transmission electron microscope (TEM) at  
10 120 keV. Formvar/carbon-coated 200 mesh copper grid (TAAB) were dipped in a solution of  
11 the GNRs of interest and left to dry in air. More than 100 GNRs were considered for image  
12 analysis.

13 **Lentivirus vectors.** Lentivirus vectors were constructed on the pHIV-Luciferase backbone (a  
14 gift from Bryan Welm, Addgene plasmid # 21375). The iRFP720 ORF was obtained from  
15 plasmid piRFP720-N1 (a gift from Vladislav Verkhusha, Addgene plasmid # 45461)<sup>12</sup> and  
16 cloned as an EcoRI/XbaI fragment upstream of the IRES element of pHIV-Luciferase,  
17 resulting in the pHIV-iRFP720-IRES-Luc vector. To achieve a more efficient translation of the  
18 second ORF, the IRES element was replaced with an E2A peptide motif<sup>23,24</sup> using a two-step  
19 PCR protocol to create the pHIV-iRFP720-E2A-Luc plasmid. The complete sequence of the  
20 E2A plasmid version has been submitted to the NCBI GenBank database (accession number:  
21 MF693179). Lentivirus particles were produced in HEK293 cells via calcium phosphate co-  
22 transfection of the reporter gene plasmid, packaging plasmid psPAX2 and envelope plasmid  
23 pMD2.G (both a gift of Didier Trono, Addgene plasmids #12260 and #12259, respectively) as  
24 described<sup>25</sup>. Virus-containing cell culture supernatant was collected three days post-  
25 transfection, centrifuged at 500 g and filtered through 0.45 µm pores.

26 **Mouse mesenchymal stem/stromal cell (mMSC) line culture, labelling and**  
27 **immunofluorescence.** We chose the mouse MSC line D1 ORL UVA [D1](ATCC® CRL-12424™)  
28 for labelling and tracking, since these cells have the potential to differentiate into  
29 mesenchymal derivatives, but can occasionally also form tumours as previously shown<sup>7,26</sup>.  
30 They were grown in DMEM supplemented with 10% FBS and 2 mM L-Glutamine. Cells were  
31 transfected with purified reporter gene virus particles for 24 h. iRFP720-expressing cells

1 were sorted using a BD FACSAria III with red laser and APC-Cy<sup>TM</sup>7 filter. Cells expressing high  
2 levels of iRFP720 were selected and maintained for all further experiments. Before IVIS  
3 imaging of cells, biliverdin was added to the culture medium for 24 h to increase its  
4 concentration beyond levels present in FBS and to improve its uptake by cells for  
5 incorporation into iRFP720 as a chromophore. For analysis of reporter gene expression by  
6 immunofluorescence, mMSCs were grown on glass cover slips, fixed with 4%  
7 paraformaldehyde/PBS, washed with PBS, blocked and stained with an anti-firefly luciferase  
8 antibody (Abcam, Cambridge, UK, ab21176, diluted in 1:500 in PBS/10% donkey  
9 serum/0.25% Triton-X100) and a donkey-anti-rabbit-AlexaFluor488 secondary antibody  
10 (Molecular Probes, A21206). Fluorescence of iRFP720 was assessed directly using a Zeiss  
11 LSM510 Multiphoton microscope.

12 GNR-labelling was performed as previously published <sup>7</sup>. Briefly, cells were treated with cell  
13 medium containing GNRs at the concentration / optical density indicated in the main text  
14 (always 79% cell medium, 20% GNRs in water, 1% penicillin-streptomycin). Then, cells were  
15 dissociated with trypsin, resuspended in fresh medium, washed twice with PBS, and  
16 counted using an automated cell counter (TC10, BioRad, Watford, UK).

17 **Cell viability.** Cell viability was assessed with Cell Titer Glo ATP Assay (Promega). Cells were  
18 labelled as described above by seeding 10<sup>4</sup> mMSCs cells in 96-well plates. Cells were  
19 incubated with GNRs-710 and GNR-860 at a final O.D. in media=1, 2, 3.2, and 4 (80% media  
20 and 20% GNRs solution in each case) for 24 h. After labelling, cells were washed 3 times with  
21 PBS. 50 µL of medium were added to each well and then 25 µL of the ATP reagent was  
22 added. The plate was mixed in an orbital shaker and, after 10 min, the contents of the plate  
23 were transferred to white, opaque, 96-well plates and the luminescence measured with a  
24 plate reader (Fluostar Omega, BMG Labtech, Aylesbury, UK). Each condition was assessed in  
25 triplicate and results are given as % ± SD in respect to cells that were incubated with no  
26 GNRs as described above.

27 **Preparation of cells for TEM.** Cells were fixed with a solution containing 1%  
28 paraformaldehyde and 3% glutaraldehyde in 0.1 M cacodylate buffer (pH 7.4). Then, cells  
29 were incubated with a reduced osmium staining solution, containing 2% OsO<sub>4</sub> and 1.5%  
30 K<sub>4</sub>[Fe(CN)<sub>6</sub>], for 1 hour. This was followed by a second 1 h osmium staining (2% OsO<sub>4</sub>) step  
31 and overnight staining with 1% uranyl acetate. Cells were washed with water for 3 min, 3

1 times after every staining step. Samples were then dehydrated in graded ethanol (30%, 50%,  
2 70%, 90% and 2x 100%) for 5 min each. Finally, samples were infiltrated with medium TAAB  
3 resin 812 and embedded within the same resin. The resin was cured for 48 h at 60°C. Finally,  
4 ultrathin sections of 350 µm x 350 µm x 74 nm were cut and placed in 200-mesh  
5 Formvar/Carbon filmed grids. They were post-stained with uranyl acetate (4% UA in a 50:50  
6 ethanol/water solution) and Reynolds lead citrate before TEM imaging.

7 **Animals.** 8–10 week old female SCID hairless outbred (SHO) mice (Charles River, Margate,  
8 UK) were housed in individually ventilated cages at a 12 h light/dark cycle, with *ad*  
9 *libitum* access to food and water. Experimental animal protocols were performed in  
10 accordance with the guidelines under the Animals (Scientific Procedures) Act 1986  
11 (licence PPL70/8741) and approved by the University of Liverpool Animal Welfare and  
12 Ethical Review Body. The tumour burden was monitored and kept within recommended  
13 limits in accordance with guidelines for the welfare and use of animals in cancer  
14 research<sup>27</sup>. Experiments are reported in line with the ARRIVE guidelines. These  
15 experiments aimed at evaluating the potential of MSOT to track cells over the short and  
16 long-term. The number of animals was chosen so that a range of tumour positions and  
17 sizes could be observed (Table 1). Image quantification is presented to demonstrate the  
18 information that can be extracted from this approach. In each case, the numbers  
19 correspond to the particular animal presented. The data for these exemplar animals as  
20 well as for the other animals are available in the data repository Zenodo<sup>28</sup>.

21

1 **Table 1. Summary of mice used and analysed for the experiment.**

| Group         | Transfected | GNR-710 | GNR-860 | Number of animals |
|---------------|-------------|---------|---------|-------------------|
| I (control)   | ✓           |         |         | 2                 |
| II (GNR-710)  | ✓           | ✓       |         | 3                 |
| III (GNR-860) | ✓           |         | ✓       | 4                 |

2

3

4 **Intracardiac injection and imaging.** Transfected cells were labelled with GNR-710 and GNR-  
5 860 at O.D.=2.4 as detailed above.  $1.5 \times 10^6$  cells in 100  $\mu$ L PBS were prepared for  
6 intracardiac injection as described below. All cell injection and imaging procedures of mice  
7 were carried out under general isoflurane/oxygen anaesthesia.

8 The imaging routine at day 0 was composed of the following sequence of steps: 1) a  
9 baseline MSOT scan; 2) the ultrasound-guided (Prospect imaging system, S-Sharp, New  
10 Taipei City, Taiwan) intracardiac injection of cells into the left ventricle; 3) a second MSOT  
11 scan after 10 min for acclimatisation; 4) BLI, for which the mouse received an  
12 intraperitoneal injection of D-luciferin (approximately 150  $\mu$ g/g body weight) 15 min before  
13 whole body imaging using an IVIS Spectrum system (Perkin Elmer, Seer Green, UK). All data  
14 were analysed with Living Image (Perkin Elmer) and data are displayed in radiance units. On  
15 subsequent days the MSOT scan and BLI were repeated in the same manner.

16 For intracardiac injection of cells, mice were positioned supine on a heated platform. Fur  
17 around the chest area was removed using depilatory cream and limbs were taped down to  
18 keep the mouse position fixed. Ultrasound gel was applied liberally to the chest area and  
19 the ultrasound transducer (Prospect imaging system, S-Sharp) was positioned above the  
20 chest so the long axis view of the left ventricle was visible. 100  $\mu$ l of cell suspension was  
21 drawn up into an insulin syringe (29 G) and, using the ultrasound image as guidance, was  
22 inserted into the left ventricle of the heart. Cell suspension was then administered slowly  
23 over a period of approximately 30 s.



1 For optoacoustic imaging, an MSOT inVision 256-TF small animal imaging system (iThera  
2 Medical GmbH, Munich, Germany) was used <sup>29</sup>. After acclimatisation for 10 min inside the  
3 water bath, a whole-body scan was performed on the mouse with 1 mm steps and the  
4 following wavelengths for acquisition: 660, 670, 680, 690, 700, 705, 710, 715, 725, 735, 750,  
5 765, 780, 795, 810, 820, 830, 840, 850, 860, 870, 880, 890, 900, 910, 920, 930, 940, 1025,  
6 1050, 1075, and 1100 nm. Heavy water was used in the water bath due to its low  
7 absorbance at wavelengths >910 nm (contrary to regular water). Linear-mode-based  
8 reconstruction and guided ICA multispectral processing were applied using viewMSOT  
9 software v3.6 (iThera Medical GmbH).

## 1 **Results and discussion**

2

### 3 **Gold nanorod synthesis and cell labelling**

4 Two types of GNRs with distinct optical spectra were prepared following previously  
5 published protocols<sup>21,22</sup>. The first batch consisted of GNRs with a longitudinal surface  
6 plasmon resonance (LSPR) peak at 710 nm (GNR-710). Their core size was  $60.0 \pm 7.5$  nm by  
7  $25.7 \pm 3.7$  nm with an average aspect ratio of  $2.3 \pm 0.3$ . The second batch had a LSPR peak at  
8 860 nm (GNR-860). In this case, their size was  $93.8 \pm 9.3$  nm by  $25.2 \pm 4.4$  nm with an  
9 average aspect ratio of  $3.8 \pm 0.5$  (Figure 1a). Both GNRs were prepared to have LSPR bands  
10 in the NIR to favour their detection deep inside tissues.

11 We have recently demonstrated that a 35 nm silica shell is needed to minimise plasmon  
12 coupling between GNRs after cell uptake<sup>7</sup>. This enables the preservation of intrinsic optical  
13 properties resulting in an increased sensitivity for photoacoustic detection. Hence, both  
14 GNR batches were coated with a silica shell as previously described. Specifically, GNR-710  
15 and GNRs-860 nm have a silica shell thickness of  $38.7 \pm 1.9$  nm and  $35.7 \pm 1.6$  nm  
16 respectively (Figure 1a).

17 A murine MSC line was selected for labelling and tracking, since these cells have the  
18 capability to differentiate into mesenchymal derivatives, but can also form tumours  
19 occasionally<sup>7,26</sup>. The cells, which had first been transfected with a reporter gene vector (see  
20 below), were incubated with different concentrations of GNR-710 and GNR-860 for 24  
21 hours. To provide a better comparison between GNRs of different sizes, we standardize and  
22 report the GNR concentrations by the optical density (O.D.) of the peak, because absorption  
23 is what triggers the photoacoustic response. For reference, O.D.=4 corresponds to ~100 pM  
24 GNR-710 and ~72.5 pM GNR-860 (calculated by relating the absorbance at 400 nm of GNRs  
25 before silica coating to concentrations of molecular gold)<sup>30</sup>.

26 To characterize their uptake, cells were incubated with GNRs at O.D.=3 for 24 h. TEM images  
27 of cells show GNRs localised inside vesicles, with silica shells separating the gold cores  
28 (Figure 1b, and Supplementary File 1). In line with our previous report, the optical  
29 properties of GNRs were largely preserved after cell uptake (Figure 1d). Preservation of the  
30 absorbance intensity and the shape of the plasmon band are prerequisite for an optimal

1 photoacoustic detection of GNR-labelled cells since it relies on a spectral deconvolution to  
2 differentiate intrinsic absorbers from probes.  
3 To confirm that the cell labelling does not cause any toxicity, cell viability after exposure to a  
4 range of GNR concentrations up to O.D.=4 was assessed (Figure 1e). Only at the highest GNR  
5 concentration was a slight decrease in cell viability observed:  $92.0 \pm 2.6\%$  and  $91.7 \pm 1.6\%$   
6 for GNR-710 and GNR-860, respectively. These results are in agreement with our previous  
7 work, in which we showed that silica coated GNRs did not affect cell viability, proliferation  
8 or differentiation potential of the mMSCs<sup>7</sup>.

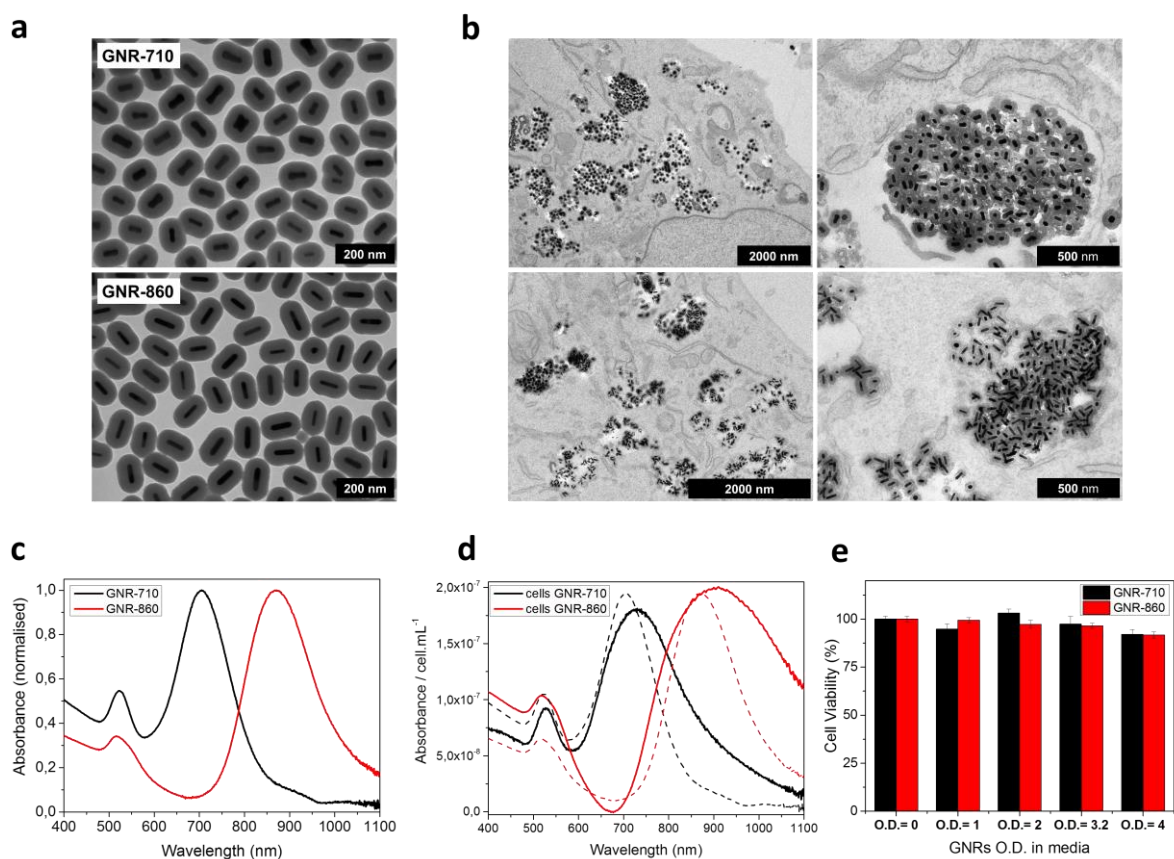

9

10 **Figure 1. GNR characterization and cell labelling.** (a) Representative TEM pictures of GNR-  
11 710 (top) and GNR-860 (bottom). (b) TEM pictures of GNR-710 (top panels) and GNR-860  
12 (bottom panels) inside cells. In both cases, the silica shell provides steric hindrance to  
13 minimise plasmon coupling in cellular vesicles. (c) Vis-NIR spectrum of GNRs in solution. (d)  
14 Vis-NIR spectrum of cells labelled with the corresponding GNRs. Dashed lines correspond to  
15 GNRs in solution. (e) Cell viability at different optical densities.

16

## 1 **Generation of iRFP720-Luciferase bi-cistronic lentivirus reporter gene vectors and** 2 **characterisation of labelled cells**

3 To combine the sensitivity of bioluminescence imaging with the spatial resolution of MSOT,  
4 we generated bi-cistronic lentivirus vectors for expression of firefly luciferase and iRFP720  
5 from the general eukaryotic EF1 $\alpha$  promoter (Figure 2a). We compared vectors containing  
6 either an internal ribosome entry site (IRES)<sup>31</sup> or a self-cleaving 2A element<sup>23 24</sup>, to  
7 determine the most efficient method of translating the second open reading frame (ORF;  
8 encoding luciferase) from a single mRNA. Following transfection with lentivirus vectors, the  
9 mMSCs were selected by FACS for iRFP720 fluorescence, to obtain an IRES-vector and an  
10 E2A-vector transfected cell population, respectively, with similar levels of expression of the  
11 first ORF protein (iRFP720) (Figure 2b). Co-expression of iRFP720 and luciferase in individual  
12 cells was confirmed by immunocytochemistry (Figure 2c), which also indicated that, in  
13 contrast to luciferase, iRFP720 was preferentially localised in the nucleus. To compare the  
14 levels of expression of luciferase from the IRES-vector and E2A-vector transfected cells,  
15 fluorescent and bioluminescent signals were quantified in cell suspensions using an IVIS  
16 Spectrum imager. For both types of reporter cells (IRES-vector and E2A-vector transfected),  
17 the fluorescence signal intensity for iRFP720 was the same, but the E2A-vector transfected  
18 cells showed a 5 times higher luciferase bioluminescence (Figure 2d, e). These data indicate  
19 that in the context of our bi-cistronic lentivirus vectors, a superior translation efficiency of  
20 the second ORF from a single mRNA was achieved via an E2A element as compared to an  
21 IRES element. We therefore used the pHIV-iRFP720-E2A-Luc vector in all further  
22 experiments described herein. Proof of principle of the application of this vector for multi-  
23 modal imaging was tested in preliminary experiments, in which cells were injected  
24 subcutaneously and monitored with bioluminescence, fluorescence and photoacoustic  
25 imaging (Supplementary File 2).

26

27

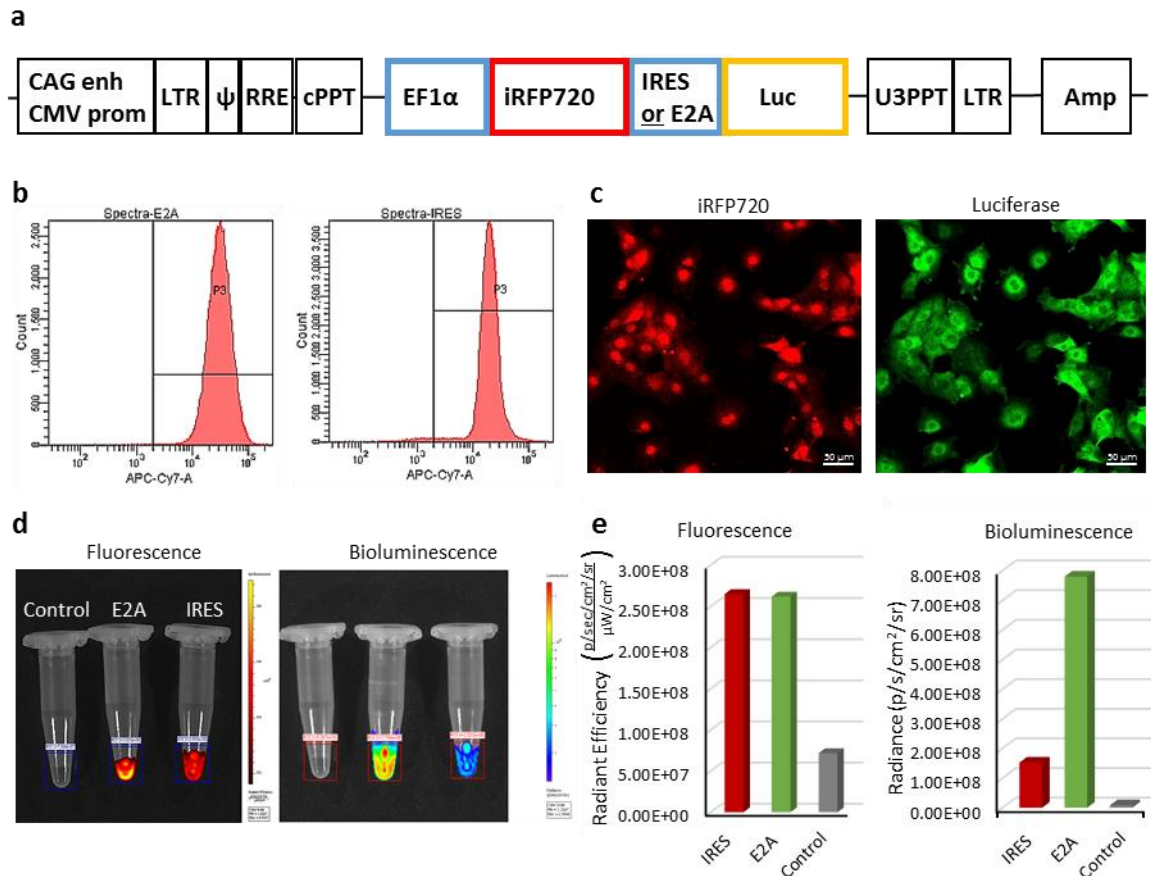

1  
 2 **Figure 2. Characterisation of iRFP720-Luciferase bi-cistronic lentivirus reporter gene**  
 3 **vectors and transfected cells *in vitro*.** a) Scheme of the vectors that mediate co-expression  
 4 of iRFP720 and firefly luciferase either via IRES- or E2A-mediated mechanisms. b) FACS  
 5 analyses of iRFP720 fluorescent signal intensity in mMSCs transfected with either the IRES or  
 6 E2A vector, respectively, indicated similar levels of expression of the first ORF. c) Confocal  
 7 fluorescence microscopy of transfected cells for co-expression of iRFP720 and luciferase  
 8 (immunofluorescence). In contrast to Luc, iRFP720 accumulated in the nucleus. d), e)  
 9 Comparison of fluorescent and bioluminescent signal intensities from IRES and E2A vector-  
 10 transfected cell populations using IVIS Spectrum imaging. Although both cell suspensions  
 11 provided very similar levels of fluorescence from the first reporter ORF (iRFP720) in the  
 12 region of interest (ROI), bioluminescence levels were 5-fold higher in the E2A vector-  
 13 transfected cell population, indicating a more efficient translation of the second ORF  
 14 (luciferase) from the E2A element than from the IRES. Fluorescence was measured first,  
 15 followed by addition of CycLuc1 to the cell suspension and bioluminescence imaging.

16  
 17

## 1 **Imaging biodistribution of cells after intracardiac injection**

2 In our previous work <sup>7</sup> and in many cell tracking studies, proof of principle of the utility of  
3 nanoparticles as contrast agents for photoacoustic cell detection has been obtained by  
4 imaging labelled cells implanted locally <sup>32,33</sup>. Here, we address the much more challenging  
5 case of a systemic injection where cells spread through the body and the signal, therefore,  
6 becomes diluted. Specifically,  $1.5 \times 10^6$  mMSCs transduced with the iRFP720-E2A-Luc  
7 lentivirus and labelled with GNRs were administered via ultrasound-guided intracardiac  
8 injection into the left ventricle. Left ventricle administration was chosen for cells to enter  
9 the arterial circulation rather than the venous. This allows cells to pass through all organs  
10 before returning to the right ventricle and subsequently lungs, where they become  
11 sequestered in the pulmonary microvasculature <sup>34,35</sup>. To provide a detailed assessment of  
12 cell localisation, we combined photoacoustic tomography imaging at 1 mm steps with  
13 bioluminescence detection. While bioluminescence imaging provides excellent sensitivity,  
14 its anatomical resolution is poor mainly due to the high scattering of photons by tissue <sup>36,37</sup>.  
15 By contrast, photoacoustic imaging provides superior spatial resolution (150  $\mu\text{m}$  in our  
16 system) <sup>19</sup>. To demonstrate the potential of this multimodal approach to precisely  
17 determine the localisation of distributed nanorod-labelled cells, we show the correlation  
18 between bioluminescence imaging and MSOT imaging (Figure 3). Cell localisation in the  
19 head, liver and kidney regions was clearly observed with both imaging modalities (Figure 3a,  
20 b), and the cell presence within organs was confirmed in the photoacoustic scans through  
21 the respective regions (Figure 3c). This distribution is in agreement with other, different  
22 types of assessments in previous reports <sup>38</sup>. The presence of cells in the brain region is  
23 probably due to cell trapping in small capillaries, as reported also in other studies after  
24 intracardiac injection of cells <sup>39</sup>. It should be noted here that there was no difference in the  
25 bioluminescence signal biodistribution when cells with or without gold nanorods were  
26 injected, indicating that GNR uptake does not affect the overall behaviour of the cells



1 (Supplementary File 4).

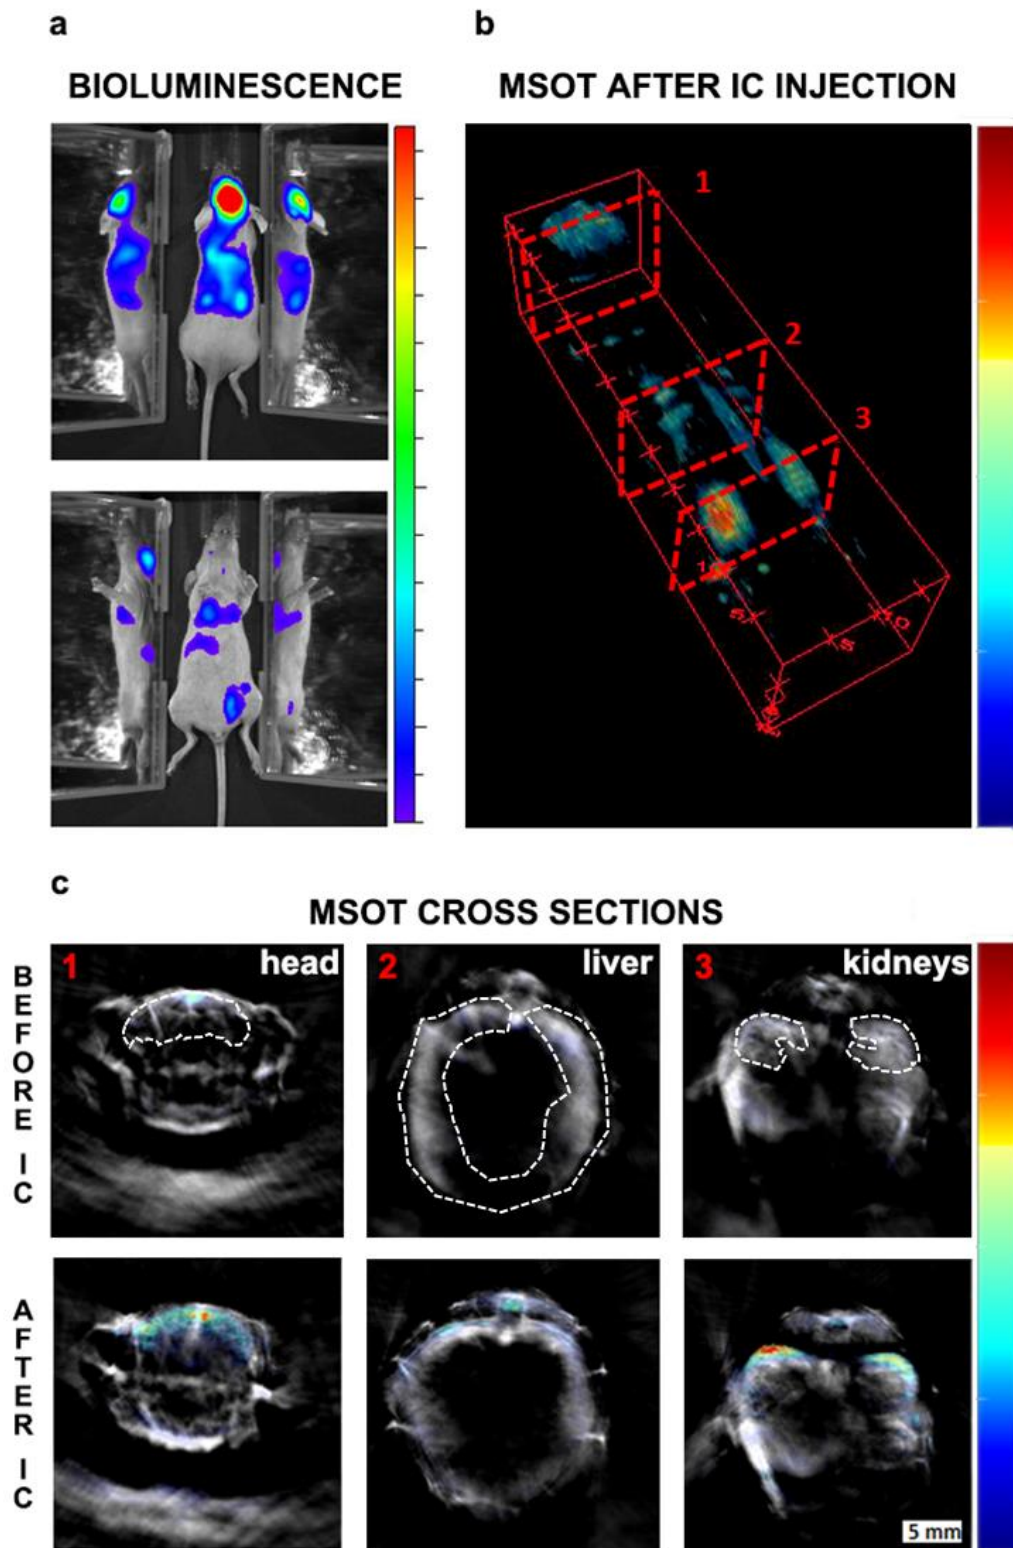

2

3 **Figure 3. Initial biodistribution of GNR-860 labelled cells after intracardiac administration.**

4 (a) Bioluminescence imaging in dorsal (top panel) and ventral (bottom panel) position after

5 cell administration. Mirrors were placed on the side of the mouse to provide a lateral view.

1 (b) MSOT imaging of the same animal: 3D reconstruction for the whole animal showed the  
2 correlation between GNR-860 signal with bioluminescence imaging (360° animation  
3 available in Supplementary File 3). (c) Cross sections corresponding to the planes shown in  
4 (b) before and after the injection of cells. Sub-organ localisation of cells can be observed  
5 here (see main text for details and supporting information for the whole set of cross section  
6 images). The brain, liver and kidney are outlined. Colour scales are  $3.0 \times 10^5$  to  $1.8 \times 10^6$   
7 radiance units ( $\rho \cdot \text{s}^{-1} \cdot \text{cm}^{-2} \cdot \text{sr}^{-1}$ ) in (a) and 0.9 to 21 MSOT intensity (a.u.) in (b) and (c).

8

9 To further test the robustness and specificity of the signal, additional controls were  
10 performed. First, following the same imaging protocols, we observed a similar  
11 biodistribution pattern for mice injected with either GNR-710 or GNR-860 labelled cells  
12 (Supplementary Files 4, 5). Second, when we applied the unmixing algorithm with the  
13 'wrong' spectrum (i.e. the GNR-710 spectrum to an animal injected with GNR-860 labelled  
14 cells, and vice versa), no GNR-specific signals were detected in photoacoustic images pre-  
15 and post-injection (Figure 4). Third, when the photoacoustic spectra of regions of interest  
16 before and after injection of cells were extracted, an increase in the photoacoustic intensity  
17 was only observed in the range of wavelengths in which corresponding GNRs have the  
18 higher absorbance, while intensity in the other wavelengths remained similar  
19 (Supplementary File 6). It has to be noted that in some cases there were regions with an  
20 endogenous absorbance similar to GNRs (e.g. food in the intestines has similar spectra as  
21 GNR-710), which can lead to misinterpretation (Supplementary File 5). For this reason, a  
22 scan was performed before cells were injected, which allowed detection of any potential  
23 endogenous interference with the GNR signal. Using a multimodal imaging approach (in this  
24 case luminescence and photoacoustic) also assisted in discounting any false positive signals.  
25 As expected, the photoacoustic signal provided by iRFP720 expression was not strong  
26 enough to detect the cells immediately after injection by means of photoacoustic imaging  
27 (Figure 4).

28



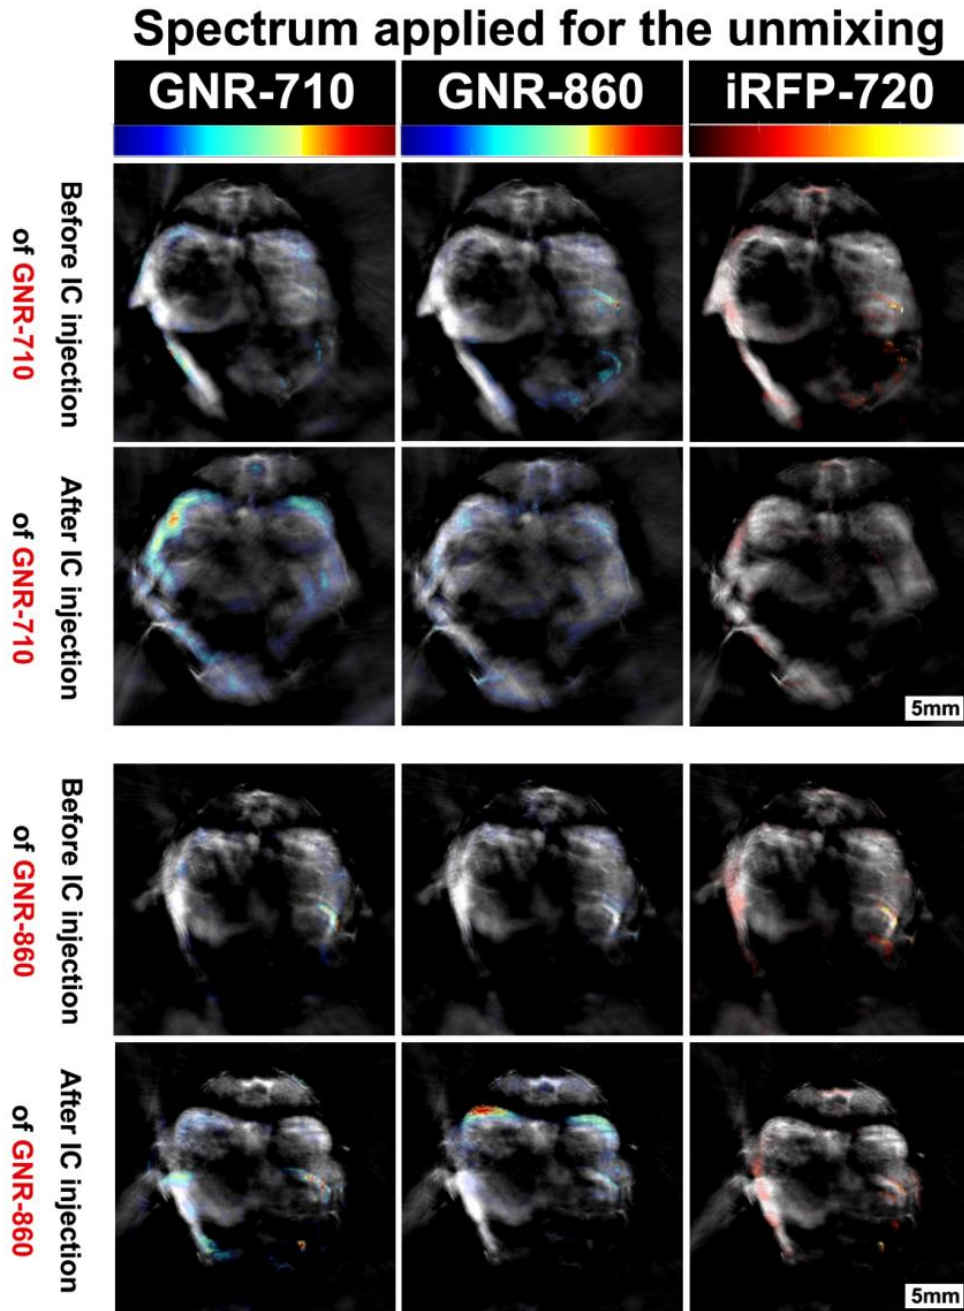

1

2 **Figure 4. Specificity of the multispectral unmixing.** Signal before and after treatment with  
3 GNR-710 labelled cells (upper panel) and GNR-860 labelled cells (bottom panel) in  
4 transverse sections at the level of the kidney region of the corresponding mouse. Signals  
5 were observed in the kidney only when the spectra of the respective component (GNR-710  
6 in upper panel and GNR-860 in bottom panel) was applied. Note also that iRFP720 unmixing  
7 did not result in a signal at this stage. Colour scales are 0.1 to 14, 0.9 to 21, and 0.0 to 15  
8 MSOT intensity (a.u.) for GNR-710, GNR-860, and iRFP720, respectively.

1

## 2 **Clearance and fate of the cells and GNRs after initial biodistribution**

3 Within 24 hours after GNR-labelled cell infusion, only between 15-22% of the initial  
4 bioluminescence signal in whole mice persisted (Figure 5b), decreasing to less than 4% by  
5 day 5. Such substantial amounts of cell death following cell infusion were expected from  
6 previous reports<sup>40,41</sup>. A similar degree of cell death was observed with cells not labelled  
7 with GNRs, indicating that cell loss *in vivo* was not caused by GNR labelling (Supplementary  
8 File 7). Interestingly, from this stage onwards the bioluminescence images no longer  
9 correlated with the photoacoustic imaging (Figure 5a-c), indicating that the vast majority of  
10 GNRs followed a different path than the remaining luciferase-expressing cells. Specifically,  
11 although the luminescence intensity had decreased substantially by 24 h, the distribution of  
12 the signal remained the same (Figure 5b). By contrast, the MSOT signal for GNR-860  
13 increased dramatically in the liver over the same timescale, but was substantially reduced in  
14 regions such as the kidneys and head where it had been predominant immediately after cell  
15 injection (Figure 5a, c). Whilst luminescent signal is based on living cells, photoacoustic  
16 signal can be produced from GNRs independently, irrespective of whether they are within  
17 cells, or if the cells are viable. Thus, these data suggest that the liver plays an important role  
18 in the clearance of GNRs and potentially associated cell debris following the massive loss of  
19 cells during the first 24 h after injection, as previously reported<sup>42,43</sup>. In addition, these  
20 findings are in line with reports describing nanoparticle clearance through the hepato-biliary  
21 tract<sup>44-46</sup>. We observed that the clearance could be continuously monitored in a longitudinal  
22 fashion since the photoacoustic signal in the liver dropped by 47% after 5 days and by 73%  
23 after 25 days (Figure 5d).

24

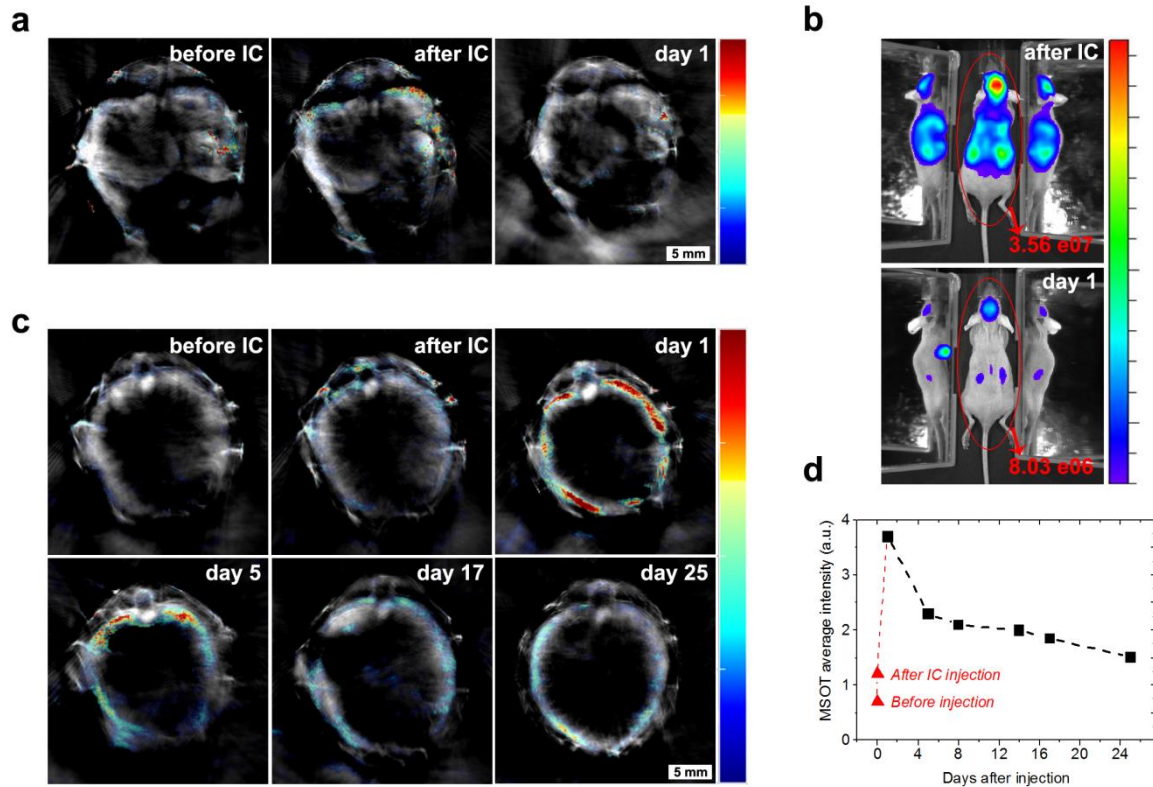

1

2 **Figure 5. Cell death and clearance of GNR-860 from day 1 after injection.** (a) MSOT signal in  
3 kidneys disappeared almost completely at day 1. (b) Total bioluminescence decreased by  
4 78% at day 1 indicating a large amount of cell death. (c) In contrast to the kidneys, MSOT  
5 signal in liver increased substantially at day 1, which suggests that GNRs accumulated in the  
6 liver. (d) After day 1, MSOT signal in liver decreased progressively. Colour scales in (a) and  
7 (c) is 0.5 to 8 MSOT intensity (a.u.). Colour scale in (b) is  $7.0 \times 10^4$  to  $5.8 \times 10^5$  radiance units  
8 ( $\rho \cdot \text{s}^{-1} \cdot \text{cm}^{-2} \cdot \text{sr}^{-1}$ ).

9

## 10 Tumour monitoring

11 Following the substantial loss in cell viability over the first 24 h, signal intensity declined  
12 further and by day 5 cells were no longer detectable by BLI in the regions where they had  
13 first accumulated (i.e. brain, kidneys and spinal cord, Figure 3). However, we now observed  
14 BLI signals from cells that had settled in different locations (Supplementary File 8). The  
15 signal intensity increased over the following weeks as cells grew into tumours  
16 (Supplementary File 8). Since the mMSC cell line had been reported to form osteoid  
17 structures *in vivo*<sup>26</sup>, and recent results from our group have revealed the capacity of the

1 cells to form osteosarcomas<sup>47</sup>, we anticipated the possibility of tumour development. In  
2 other studies, this process has been typically monitored by bioluminescence imaging<sup>48</sup>,  
3 which allows the intensity of the signal to be correlated with the number of living cells.  
4 However, bioluminescence is limited by the poor spatial resolution at depths beyond 1 mm  
5 due to photon scattering. We therefore evaluated the potential of MSOT to determine the  
6 precise localisation of internal tumours as well as their size and shape. We used the  
7 constitutive expression of iRFP720 for the long-term monitoring of tumour growth by means  
8 of photoacoustic imaging. Presence of iRFP720 resulted in a change of the photoacoustic  
9 spectra in the regions where cells were forming tumours (Figure 6, Supplementary File 9).  
10 The fact that the iRFP720 absorption spectrum is very different from the main endogenous  
11 absorbers (a sharp band peaking at 690-700 nm, Supplementary File 9) facilitated its  
12 detection even with minimal changes of photoacoustic intensity with respect to the  
13 background.

14 Mice developed tumours in different locations whether the cells were labelled with GNRs or  
15 not (Figure 6 without GNRs and Figure 8 with GNRs). This process could be monitored  
16 longitudinally by bioluminescence and MSOT as shown in Figure 6, where a number of  
17 tumours formed in a mouse 30 days after administration of cells labelled with the iRFP720-  
18 Luciferase lentivirus. After scanning the animal in 1 mm steps, multispectral processing of  
19 the corresponding cross sections (Figure 6b) revealed the presence of tumours on the right  
20 shoulder (1), spinal cord (2), in the region dorsal of the kidney (2a and 2b), back (3), hip (4  
21 and 5), and right leg (6). Tumours 2a and 2b are very illustrative of the outcomes that can be  
22 achieved with this approach. From the *in vivo* bioluminescence images (Figure 6a), it is  
23 difficult to determine the localisation of the tumours as either subcutaneous or in deep  
24 tissues, and with which organs they are associated. Analysis of photoacoustic images  
25 revealed that those tumours were growing in an unusual position close to and dorsal of the  
26 kidneys (Figure 6b). *Ex vivo* luminescence imaging confirmed the observations made with *in*  
27 *vivo* photoacoustic tomography (e.g. tumour masses 2a and 2b were found attached to the  
28 anterior-dorsal part of the kidneys) (Figure 6c). Expression of iRFP720 was also confirmed by  
29 *ex vivo* fluorescence imaging of these tumours (Supplementary File 10).

30

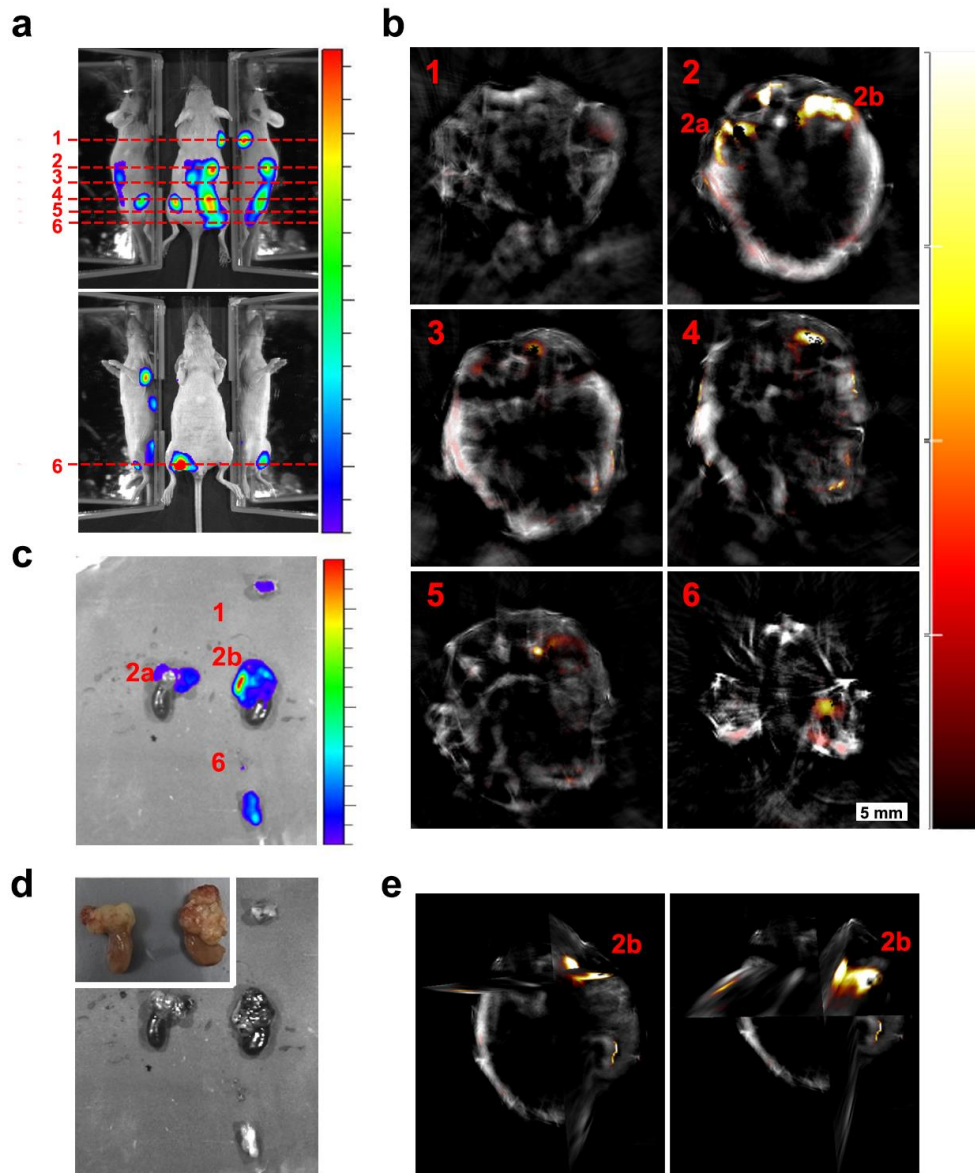

1

2 **Figure 6. Localisation of tumours 30 days after injection of cells.** (a) Bioluminescence  
3 images showing different tumours spread along the mouse body. Dashed lines indicate the  
4 approximate region shown in the MSOT scans. (b) Relevant MSOT transverse sections  
5 showing the precise localisation of different tumours after applying the multispectral  
6 processing for iRFP720. (c) *Ex vivo* luminescence imaging confirmed the localisation of  
7 relevant tumours imaged with MSOT. (d) *Ex vivo* picture of the tumours shown in (c) with a  
8 detail of kidneys in the inset. (e) Orthoslice images of tumour 2b in (b). Frontal view (left)  
9 and tilted view (right) provide a better spatial visualisation of the tumour's precise  
10 localisation, extending anterior from the dorsal part of the right kidney. Colour scales are 1.4



1  $\times 10^8$  to  $8.5 \times 10^8$  radiance units ( $\rho \cdot \text{s}^{-1} \cdot \text{cm}^{-2} \cdot \text{sr}^{-1}$ ) in (a) and  $2.6 \times 10^8$  to  $5.3 \times 10^9$  radiance  
2 units in (c). Colour scale in (b) is 0.4 to 15 MSOT intensity units (a.u.)

3

4 In addition to improving the anatomical localisation of internal tumours, photoacoustic  
5 tomography using iRFP720 expression also allowed precise longitudinal monitoring of  
6 tumour development from very early stages. The example in Figure 7 shows the growth of  
7 tumour 4 (Figure 6) from day 13 to day 30 after cell injection. The excellent spatial  
8 resolution enabled the localisation of this tumour in the vicinity of the pelvic ilium from day  
9 13. The tumour mean diameter at this stage was 1.2 mm. By day 19, 23 and 30 it had  
10 expanded to 2.0, 2.2 and 3.3 mm, respectively. Furthermore, changes in the shape of the  
11 tumour were also monitored from day 23 onwards when it branched off into two  
12 ramifications, which grew attached to the main part of the tumour (Figure 7 and  
13 Supplementary File 11).

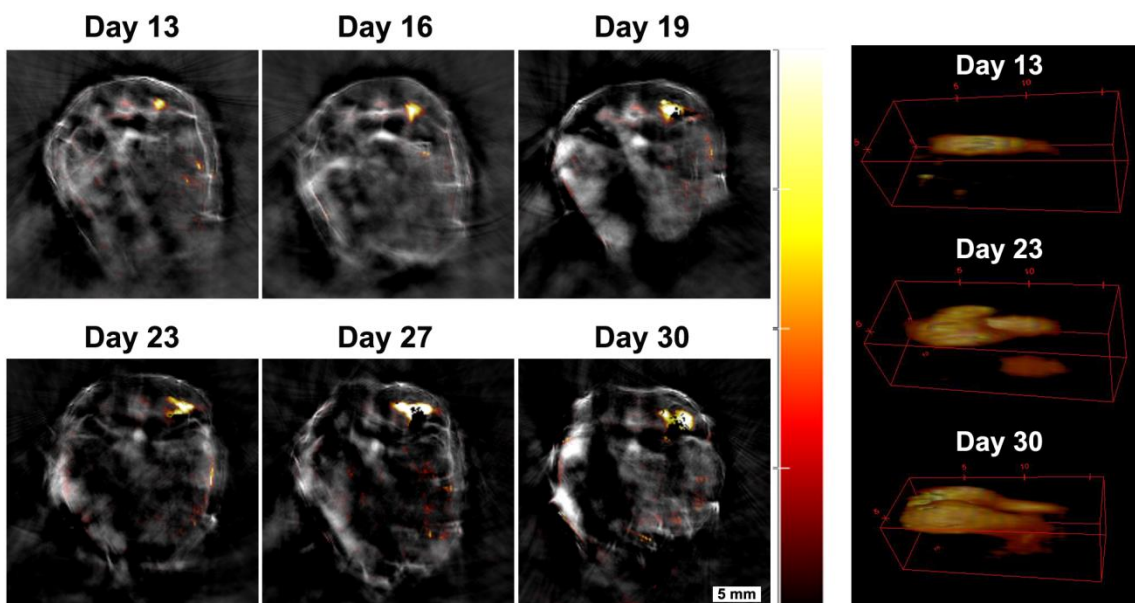

14

15 **Figure 7. Monitoring tumour growth over time.** Tumour 4 in Figure 6 was chosen to  
16 demonstrate the potential of the MSOT approach in monitoring tumour growth  
17 longitudinally over time. A small tumour was localised in the pelvic ilium region at day 13  
18 and its growth was monitored from day 13 to day 30. 3D reconstructions of the tumour are  
19 shown on the right panel (360° animations are available as Supplementary File 11). Changes

1 in size can be determined with this technique. Colour scale is 0.4 to 15 MSOT intensity units  
2 (a.u.)

3

4 In a second example, the presence of several tumours was determined 40 days after  
5 injection of GNR-860 and reporter gene labelled cells (Figure 8). Although GNRs were not  
6 used as contrast agents for tumour imaging, since the vast majority of them were cleared  
7 out following cell death, tumour growth was monitored with high spatial resolution via  
8 iRFP720 expression. The mouse shown in Figure 8 developed tumours in both shoulders, in  
9 the right dorsal kidney/adrenal gland region, towards the liver, and in several positions of  
10 the hip region. A late developing (days 33 – 40), but fast-growing tumour in the left shoulder  
11 was used to demonstrate the capabilities of iRFP720 MSOT imaging to obtain detailed  
12 spatial information in 3D reconstructions as shown in Figure 8c.

13

14 Overall, our analysis reveals that MSOT provides an excellent method to monitor tumour  
15 growth longitudinally from very early stages onwards (from sub mm size). Only some  
16 tumours growing in very peripheral positions of the animal could not be monitored due to  
17 technical or procedural limitations of the MSOT imaging system. For example, the nose  
18 could not be imaged as it was placed in the nose cone for air and anaesthesia supply during  
19 the imaging process. Also, since the animal was placed on its back, it was very difficult to  
20 avoid an air layer being trapped between the legs and the main body, which impaired sound  
21 propagation. Abundant use of ultrasound gel in this region minimised this effect and  
22 allowed data to be obtained as shown in Figure 6 (tumour 6), although the quality of the  
23 image was not as good as in other regions of the body. Any tumours in the lungs could not  
24 have been monitored with photoacoustic imaging due to a different sound propagation in  
25 air. However, the presence of tumours in the lungs could be ruled out from the  
26 bioluminescence images.

27

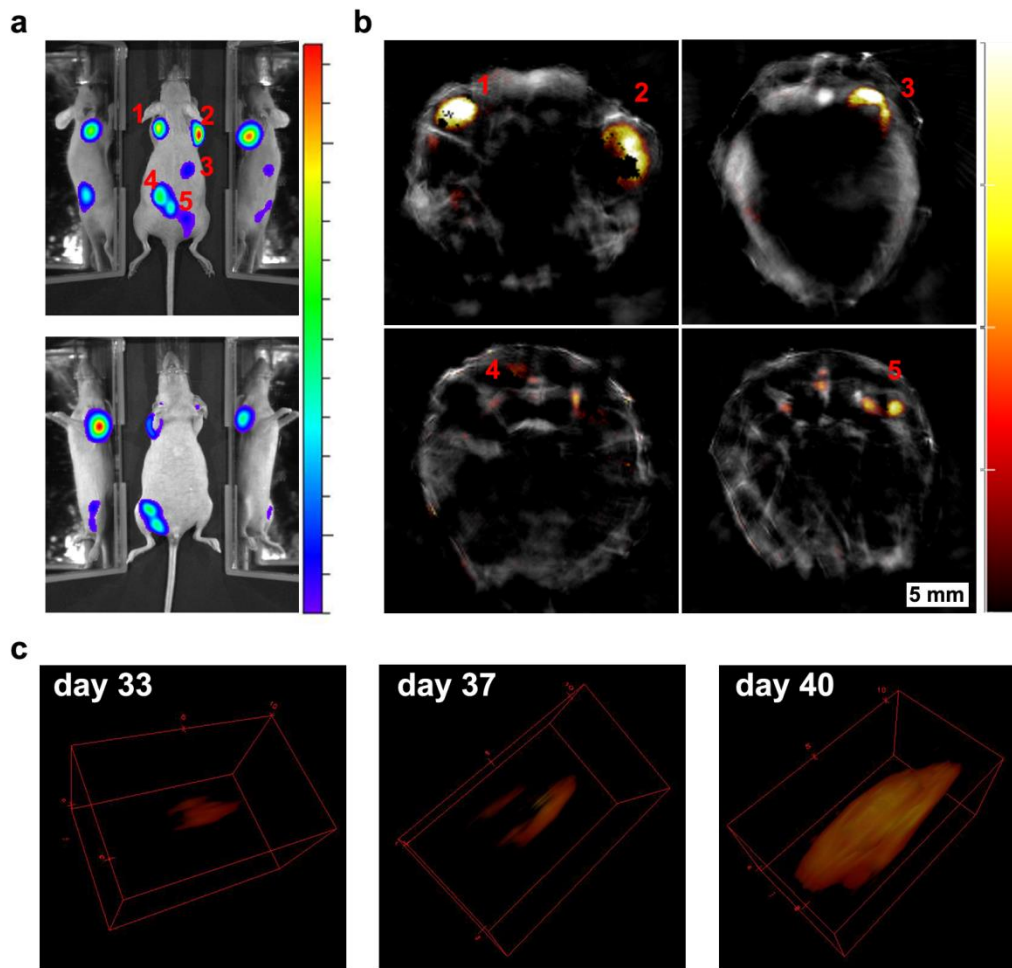

1

2 **Figure 8. Longitudinal tumour monitoring in a mouse that was injected with GNR-860 /**  
3 **reporter gene labelled cells.** Localisation of tumours 40 days after systemic injection of cells  
4 imaged by bioluminescence (a) and MSOT (b). (c) Growth of the tumour on the left shoulder  
5 was monitored from day 33 to day 40 and is shown in 3D reconstruction. Colour scale in (a)  
6 is  $1.4 \times 10^8$  to  $1.3 \times 10^9$  radiance units ( $\rho \cdot \text{s}^{-1} \cdot \text{cm}^{-2} \cdot \text{sr}^{-1}$ ) and in (b) is 1.2 to 14 MSOT  
7 intensity units (a.u.). The black pixels visible within the tumour region in (b) are an  
8 experimental artefact (see Supplementary file 12 for additional discussion).

9

## 10 **Conclusions**

11 We demonstrate here a multimodal imaging approach, which utilises a combination of GNRs  
12 and reporter genes to track cells immediately after systemic injection and longitudinally  
13 over time during the development of tumours. We show that multispectral optoacoustic



1 tomography achieves high spatial resolution of the cell distribution without compromising  
2 sensitivity. Bioluminescence imaging, which is the standard optical-based imaging  
3 technology for *in vivo* cell tracking, was also performed for comparison and validation of our  
4 results.

5 Cells were labelled with silica-coated GNRs, which provided the excellent photoacoustic  
6 sensitivity required to monitor the broad distribution of cells after systemic intra-cardiac  
7 injection. Because the GNRs maintained their optical signature when taken up by the cells,  
8 spectral unmixing could be applied in MSOT, resulting in specific detection of labelled cells.  
9 Accumulation of cells in the brain, kidneys and liver was observed in agreement with  
10 bioluminescence imaging. Systemic administration of cells was followed by a high degree of  
11 cell death as indicated by a strong decline in bioluminescence and the separation of the  
12 photoacoustic GNR signal from the BLI signal of live cells. GNR signal became localised to the  
13 liver in line with its role in the hepato-biliary clearance of GNRs and associated cell debris.

14 To monitor the formation of tumours, the mMSCs had initially been modified with bi-  
15 cistronic reporter gene vectors to express constitutively both, firefly luciferase and iRFP720.  
16 Contrary to GNRs, the amount of iRFP720 increased with cell divisions, which made it an  
17 excellent candidate for photoacoustic monitoring of tumours. This approach allowed  
18 longitudinal tumour monitoring from very early stages (< 1 mm diameter). Precise  
19 anatomical localisation and morphology of tumours were evaluated using the superior deep  
20 tissue resolution of photoacoustic tomography compared to other optical-based imaging  
21 technologies.

22 Beyond the specific study of the biodistribution and tumour development of an exemplary  
23 mesenchymal cell line performed here, we emphasise the technological potential of these  
24 labelling tools for non-invasive *in vivo* imaging and cell tracking. In particular, research fields  
25 such as cell-based regenerative medicine therapies or cancer biology might find new  
26 applications using these labelling reagents and imaging approaches for cell monitoring and  
27 safety studies.

28

29

1

2 **Acknowledgements:**

3 We thank Joseph Zeguer and Danielle Vaughan for contributions to the lentivirus vector  
4 work, the Biomedical Services Unit, the Biomedical Electron Microscopy Unit and the Centre  
5 for Preclinical Imaging at The University of Liverpool for technical support, B. Kevin Park for  
6 helpful discussion on the direction of the project, MRC, BBSRC and EPSRC for sponsorship  
7 through the UK Regenerative Medicine Platform Safety Hub (MR/K026739/1), the EU FP7  
8 and a Marie Curie Fellowship to JC (NANOSTEMCELLTRACKING).

9

10 **Competing interests:**

11 The authors declare that they have no competing interests.

12

13

14 REFERENCES

- 15 (1) Deliolanis, N. C.; Ale, A.; Morscher, S.; Burton, N. C.; Schaefer, K.; Radrich, K.;  
16 Razansky, D.; Ntziachristos, V. Deep-Tissue Reporter-Gene Imaging with Fluorescence  
17 and Optoacoustic Tomography: A Performance Overview. *Mol. Imaging Biol.* **2014**,  
18 *16*, 652–660.
- 19 (2) Wang, L. V; Yao, J. A Practical Guide to Photoacoustic Tomography in the Life  
20 Sciences. *Nat. Methods* **2016**, *13*, 627–638.
- 21 (3) Weber, J.; Beard, P. C.; Bohndiek, S. E. Contrast Agents for Molecular Photoacoustic  
22 Imaging. *Nat. Methods* **2016**, *13*, 639–650.
- 23 (4) de Almeida, P. E.; van Rappard, J. R. M.; Wu, J. C. In Vivo Bioluminescence for Tracking  
24 Cell Fate and Function. *Am. J. Physiol. Heart Circ. Physiol.* **2011**, *301*, H663-71.
- 25 (5) James, M. L.; Gambhir, S. S. A Molecular Imaging Primer: Modalities, Imaging Agents,  
26 and Applications. *Physiol. Rev.* **2012**, *92*, 897–965.

- 1 (6) Sharkey, J.; Scarfe, L.; Santeramo, I.; Garcia-Finana, M.; Park, B. K.; Poptani, H.; Wilm,  
2 B.; Taylor, A.; Murray, P. Imaging Technologies for Monitoring the Safety, Efficacy and  
3 Mechanisms of Action of Cell-Based Regenerative Medicine Therapies in Models of  
4 Kidney Disease. *Eur. J. Pharmacol.* **2016**, *790*, 74–82.
- 5 (7) Comenge, J.; Fragueiro, O.; Sharkey, J.; Taylor, A.; Held, M.; Burton, N. C.; Park, B. K.;  
6 Wilm, B.; Murray, P.; Brust, M.; Lévy, R.. Preventing Plasmon Coupling between Gold  
7 Nanorods Improves the Sensitivity of Photoacoustic Detection of Labeled Stem Cells  
8 in Vivo. *ACS Nano* **2016**, *10*, 7106–7116.
- 9 (8) Dixon, J. E.; Osman, G.; Morris, G. E.; Markides, H.; Rotherham, M.; Bayoussef, Z.; El  
10 Haj, A. J.; Denning, C.; Shakesheff, K. M. Highly Efficient Delivery of Functional  
11 Cargoes by the Synergistic Effect of GAG Binding Motifs and Cell-Penetrating  
12 Peptides. *Proc. Natl. Acad. Sci.* **2016**, *113*, 291–299.
- 13 (9) Evans, M. S.; Chaurette, J. P.; Adams, S. T.; Reddy, G. R.; Paley, M. a; Aronin, N.;  
14 Prescher, J. a; Miller, S. C. A Synthetic Luciferin Improves Bioluminescence Imaging in  
15 Live Mice. *Nat. Methods* **2014**, *11*, 393–395.
- 16 (10) Mezzanotte, L.; Aswendt, M.; Tennstaedt, A.; Hoeben, R.; Hoehn, M.; Löwik, C.  
17 Evaluating Reporter Genes of Different Luciferases for Optimized in Vivo  
18 Bioluminescence Imaging of Transplanted Neural Stem Cells in the Brain. *Contrast*  
19 *Media Mol. Imaging* **2013**, *8*, 505–513.
- 20 (11) Shcherbakova, D. M.; Baloban, M.; Verkhusha, V. V. Near-Infrared Fluorescent  
21 Proteins Engineered from Bacterial Phytochromes. *Current Opinion in Chemical*  
22 *Biology* **2015**, *27*, 52–63.
- 23 (12) Shcherbakova, D. M.; Verkhusha, V. V. Near-Infrared Fluorescent Proteins for  
24 Multicolor in Vivo Imaging. *Nat. Methods* **2013**, *10*, 751–754.
- 25 (13) Wang, L. V; Hu, S. Photoacoustic Tomography: In Vivo Imaging from Organelles to  
26 Organs. *Science* **2012**, *335*, 1458–1462.
- 27 (14) Jiguet-Jiglaire, C.; Cayol, M.; Mathieu, S.; Jeanneau, C.; Bouvier-Labit, C.; Ouafik, L.; El-  
28 Battari, A. Noninvasive near-Infrared Fluorescent Protein-Based Imaging of Tumor  
29 Progression and Metastases in Deep Organs and Intraosseous Tissues. *J. Biomed. Opt.*

- 1           **2014**, *19*, 16019.
- 2   (15) Filonov, G. S.; Krumholz, A.; Xia, J.; Yao, J.; Wang, L. V.; Verkhusha, V. V. Deep-Tissue  
3       Photoacoustic Tomography of a Genetically Encoded near-Infrared Fluorescent Probe.  
4       *Angew Chem Int Ed Engl* **2012**, *51*, 1448–1451.
- 5   (16) Krumholz, A.; Shcherbakova, D.; Xia, J.; Wang, L.; Verkhusha, V. Multicontrast  
6       Photoacoustic in Vivo Imaging Using near-Infrared Fluorescent Proteins. *Sci. Rep.*  
7       **2014**, *4*, 3939–3943.
- 8   (17) Tzoumas, S.; Deliolanis, N.; Morscher, S.; Ntziachristos, V. Unmixing Molecular Agents  
9       from Absorbing Tissue in Multispectral Optoacoustic Tomography. *IEEE Trans. Med.*  
10      *Imaging* **2014**, *33*, 48–60.
- 11   (18) Orendorff, C. J.; Murphy, C. J. Gold Nanorod Quantitation of Metal Content in the  
12      Silver-Assisted Growth of Gold Nanorods. *J. Phys. Chem. B* **2006**, *110*, 3990–3994.
- 13   (19) Ntziachristos, V.; Razansky, D. Molecular Imaging by Means of Multispectral  
14      Optoacoustic Tomography (MSOT). *Chem. Rev.* **2010**, *110*, 2783–2794.
- 15   (20) Ankrum, J.; Karp, J. M. Mesenchymal Stem Cell Therapy: Two Steps Forward, One  
16      Step Back. *Trends Mol. Med.* **2010**, *16*, 203–209.
- 17   (21) Nikoobakht, B.; El-Sayed, M. A. Preparation and Growth Mechanism of Gold  
18      Nanorods (NRs) Using Seed-Mediated Growth Method. *Chem. Mater.* **2003**, *15*, 1957–  
19      1962.
- 20   (22) Ye, X.; Jin, L.; Caglayan, H.; Chen, J.; Xing, G.; Zheng, C.; Doan-Nguyen, V.; Kang, Y.;  
21      Engheta, N.; Kagan, C. R.; Murray, Christopher B. Improved Size-Tunable Synthesis of  
22      Monodisperse Gold Nanorods through the Use of Aromatic Additives. *ACS Nano* **2012**,  
23      *6*, 2804–2817.
- 24   (23) Szymczak, A. L.; Vignali, D. A. A. Development of 2A Peptide-Based Strategies in the  
25      Design of Multicistronic Vectors. *Expert Opin. Biol. Ther.* **2005**, *5*, 627–638.
- 26   (24) Szymczak, A. L.; Workman, C. J.; Wang, Y.; Vignali, K. M.; Dilioglou, S.; Vanin, E. F.;  
27      Vignali, D. A. A. Correction of Multi-Gene Deficiency in Vivo Using a Single “Self-  
28      Cleaving” 2A Peptide-Based Retroviral Vector. *Nat. Biotechnol.* **2004**, *22*, 589–594.

- 1 (25) Kutner, R. H.; Zhang, X. Y.; Reiser, J. Production, Concentration and Titration of  
2 Pseudotyped HIV-1-Based Lentiviral Vectors. *Nat. Protoc.* **2009**, *4*, 495–505.
- 3 (26) Kuzma-Kuzniarska, M.; Rak-Raszewska, A.; Kenny, S.; Edgar, D.; Wilm, B.; Fuente  
4 Mora, C.; Davies, J. A.; Murray, P. Integration Potential of Mouse and Human Bone  
5 Marrow-Derived Mesenchymal Stem Cells. *Differentiation* **2012**, *83*, 128–137.
- 6 (27) Workman, P.; Aboagye, E. O.; Balkwill, F.; Balmain, A.; Bruder, G.; Chaplin, D. J.;  
7 Double, J. A.; Everitt, J.; Farningham, D. A. H.; Glennie, M. J.; *et al.* Guidelines for the  
8 Welfare and Use of Animals in Cancer Research. *Br. J. Cancer* **2010**, *102*, 1555–1577.
- 9 (28) Comenge, C.; Sharkey, J.; Fragueiro, O.; Wilm, B.; Brust, M.; Murray, P.; Lévy, R.;  
10 Plagge, A. Data: multimodal cell tracking from systemic administration to tumour  
11 growth by combining gold nanorods and reporter genes. *Zenodo* **2017**,  
12 <https://doi.org/10.5281/zenodo.1021607>.
- 13 (29) Morscher, S.; Driessen, W. H. P.; Claussen, J.; Burton, N. C. Semi-Quantitative  
14 Multispectral Optoacoustic Tomography (MSOT) for Volumetric PK Imaging of Gastric  
15 Emptying. *Photoacoustics* **2014**, *2*, 103–110.
- 16 (30) Pastoriza-santos, I.; Liz-marzán, L. M. Nanomaterial Interfaces in Biology **2013**, *1025*,  
17 75–93.
- 18 (31) Hellen, C. U. T.; Sarnow, P. Internal Ribosome Entry Sites in Eukaryotic mRNA  
19 Molecules. *Genes and Development*, 2001, *15*, 1593–1612.
- 20 (32) Jokerst, J. V.; Thangaraj, M.; Kempen, P. J.; Sinclair, R.; Gambhir, S. S. Photoacoustic  
21 Imaging of Mesenchymal Stem Cells in Living Mice via Silica-Coated Gold Nanorods.  
22 *ACS Nano* **2012**, *6*, 5920–5930.
- 23 (33) Nam, S. Y.; Ricles, L. M.; Suggs, L. J.; Emelianov, S. Y. In Vivo Ultrasound and  
24 Photoacoustic Monitoring of Mesenchymal Stem Cells Labeled with Gold  
25 Nanotracers. *PLoS One* **2012**, *7*, e37267.
- 26 (34) Kean, T. J.; Lin, P.; Caplan, A. I.; Dennis, J. E. MSCs: Delivery Routes and Engraftment,  
27 Cell-Targeting Strategies, and Immune Modulation. *Stem Cells International* **2013**,  
28 *2013*, 732742.

- 1 (35) Fischer, U. M.; Harting, M. T.; Jimenez, F.; Monzon-Posadas, W. O.; Xue, H.; Savitz, S.  
2 I.; Laine, G. a; Cox, C. S. Pulmonary Passage Is a Major Obstacle for Intravenous Stem  
3 Cell Delivery: The Pulmonary First-Pass Effect. *Stem Cells Dev.* **2009**, *18*, 683–692.
- 4 (36) Patterson, M. S.; Chance, B.; Wilson, B. C. Time Resolved Reflectance and  
5 Transmittance for the Non-Invasive Measurement of Tissue Optical Properties. *Appl.*  
6 *Opt.* **1989**, *28*, 2331–2336.
- 7 (37) Ntziachristos, V.; Ripoll, J.; Wang, L. V; Weissleder, R. Looking and Listening to Light:  
8 The Evolution of Whole-Body Photonic Imaging. *Nat. Biotechnol.* **2005**, *23*, 313–320.
- 9 (38) Basse, P.; Hokland, P.; Heron, I.; Hokland, M. Fate of Tumor Cells Injected into Left  
10 Ventricle of Heart in BALB/c Mice: Role of Natural Killer Cells. *J. Natl. Cancer Inst.*  
11 **1988**, *80*, 657–665.
- 12 (39) Heyn, C.; Ronald, J. A.; Mackenzie, L. T.; MacDonald, I. C.; Chambers, A. F.; Rutt, B. K.;  
13 Foster, P. J. In Vivo Magnetic Resonance Imaging of Single Cells in Mouse Brain with  
14 Optical Validation. *Magn. Reson. Med.* **2006**, *55*, 23–29.
- 15 (40) Tögel, F.; Yang, Y.; Zhang, P.; Hu, Z.; Westenfelder, C. Bioluminescence Imaging to  
16 Monitor the in Vivo Distribution of Administered Mesenchymal Stem Cells in Acute  
17 Kidney Injury. *Am. J. Physiol. Renal Physiol.* **2008**, *295*, F315–F321.
- 18 (41) Bentzon, J. F.; Stenderup, K.; Hansen, F. D.; Schroder, H. D.; Abdallah, B. M.; Jensen, T.  
19 G.; Kassem, M. Tissue Distribution and Engraftment of Human Mesenchymal Stem  
20 Cells Immortalized by Human Telomerase Reverse Transcriptase Gene. *Biochem.*  
21 *Biophys. Res. Commun.* **2005**, *330*, 633–640.
- 22 (42) Eggenhofer, E.; Benseler, V.; Kroemer, A.; Popp, F. C.; Geissler, E. K.; Schlitt, H. J.;  
23 Baan, C. C.; Dahlke, M. H.; Hoogduijn, M. J. Mesenchymal Stem Cells Are Short-Lived  
24 and Do Not Migrate beyond the Lungs after Intravenous Infusion. *Front. Immunol.*  
25 **2012**, *3*, 297.
- 26 (43) Khabbal, J.; Kerkelä, E.; Mitkari, B.; Raki, M.; Nystedt, J.; Mikkonen, V.; Bergström, K.;  
27 Laitinen, S.; Korhonen, M.; Jolkkonen, J. Differential Clearance of Rat and Human  
28 Bone Marrow-Derived Mesenchymal Stem Cells from the Brain after Intra-Arterial  
29 Infusion in Rats. *Cell Transplant.* **2015**, *24*, 819–828.

- 1 (44) Longmire, M.; Choyke, P. L.; Kobayashi, H. Clearance Properties of Nano-Sized  
2 Particles and Molecules as Imaging Agents: Considerations and Caveats.  
3 *Nanomedicine (Lond)*. **2008**, *3*, 703–717.
- 4 (45) Hirn, S.; Semmler-Behnke, M.; Schleh, C.; Wenk, A.; Lipka, J.; Schäffler, M.; Takenaka,  
5 S.; Möller, W.; Schmid, G.; Simon, U.; Kreyling, W. G. Particle Size-Dependent and  
6 Surface Charge-Dependent Biodistribution of Gold Nanoparticles after Intravenous  
7 Administration. *Eur. J. Pharm. Biopharm.* **2011**, *77*, 407–416.
- 8 (46) Lankveld, D. P.; Rayavarapu, R. G.; Krystek, P.; Oomen, A. G.; Verharen, H. W.;  
9 Leeuwen, T. G. van; Jong, W. H. De; Manohar, S. Blood Clearance and Tissue  
10 Distribution of PEGylated and Non-PEGylated Gold Nanorods after Intravenous  
11 Administration in Rats. *Nanomedicine* **2011**, *6*, 339–349.
- 12 (47) Lauren Scarfe, Arthur Taylor, Jack Sharkey, Michael Barrow, Joan Comenge, Lydia  
13 Beeken, Cai Astley, Ilaria Santeramo, Claire Hutchinson, Lorenzo Ressel, Jon Smythe,  
14 Eric Austin, Raphael Levy, Matthew J. Rosseinsky, Dave J. Adams, Harish Poptani, B.  
15 Kevin, B. W. Non-Invasive Imaging Reveals a Potential Tumourigenicity Hazard of  
16 Systemically Administered Cells. *BIORXIV 202101* **2017**.
- 17 (48) Jenkins, D. E.; Hornig, Y. S.; Oei, Y.; Dusich, J.; Purchio, T. Bioluminescent Human  
18 Breast Cancer Cell Lines That Permit Rapid and Sensitive in Vivo Detection of  
19 Mammary Tumors and Multiple Metastases in Immune Deficient Mice. *Breast Cancer*  
20 *Res.* **2005**, *7*, R444–R454.

21

22

## Supplementary material

# Multimodal cell tracking from systemic administration to tumour growth by combining gold nanorods and reporter genes.

Joan Comenge<sup>1</sup>, Jack Sharkey<sup>2,3</sup>, Oihane Fragueiro<sup>4</sup>, Bettina Wilm<sup>2,3</sup>, Mathias Brust<sup>4</sup>, Patricia Murray<sup>2,3</sup>, Raphaël Lévy<sup>1\*</sup>, Antonius Plagge<sup>2,3\*</sup>

<sup>1</sup> Institute of Integrative Biology, <sup>2</sup> Department of Cellular and Molecular Physiology, <sup>3</sup> Centre for Preclinical Imaging, Institute of Translational Medicine, <sup>4</sup> Department of Chemistry, University of Liverpool, Liverpool, UK;

Correspondence should be addressed to: [rapha@liverpool.ac.uk](mailto:rapha@liverpool.ac.uk), [plagge@liverpool.ac.uk](mailto:plagge@liverpool.ac.uk)

\* Authors contributed equally to the work.



## Supplementary material

GNR-710 in cells:

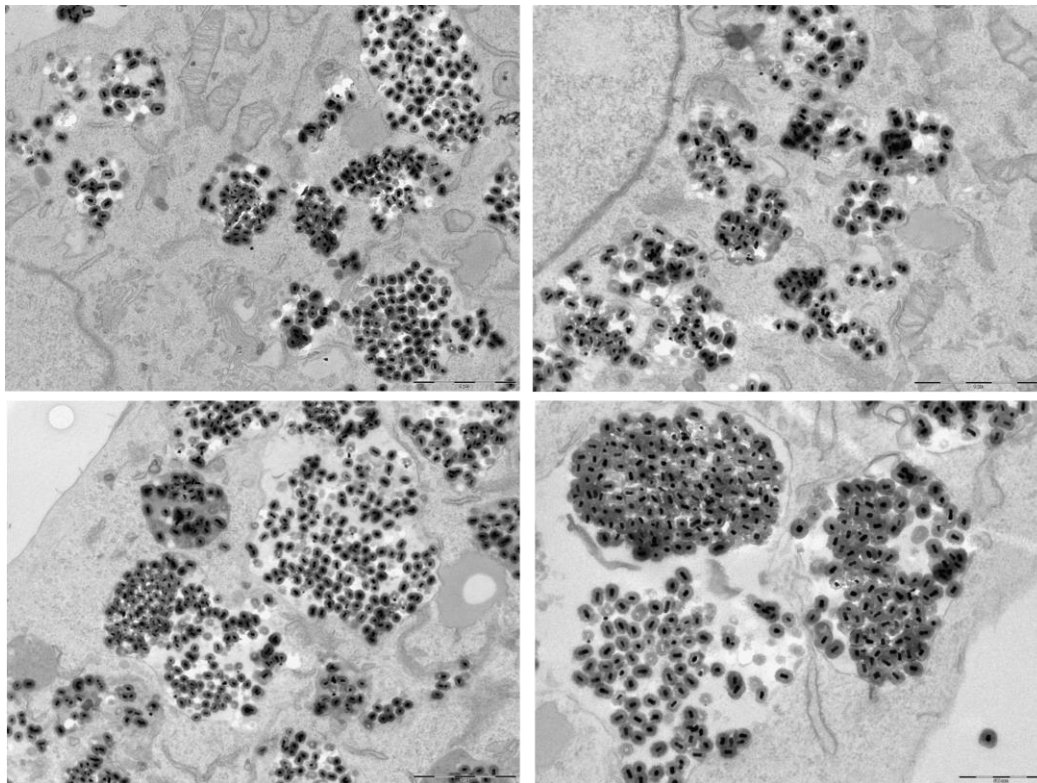

GNR-860 in cells:

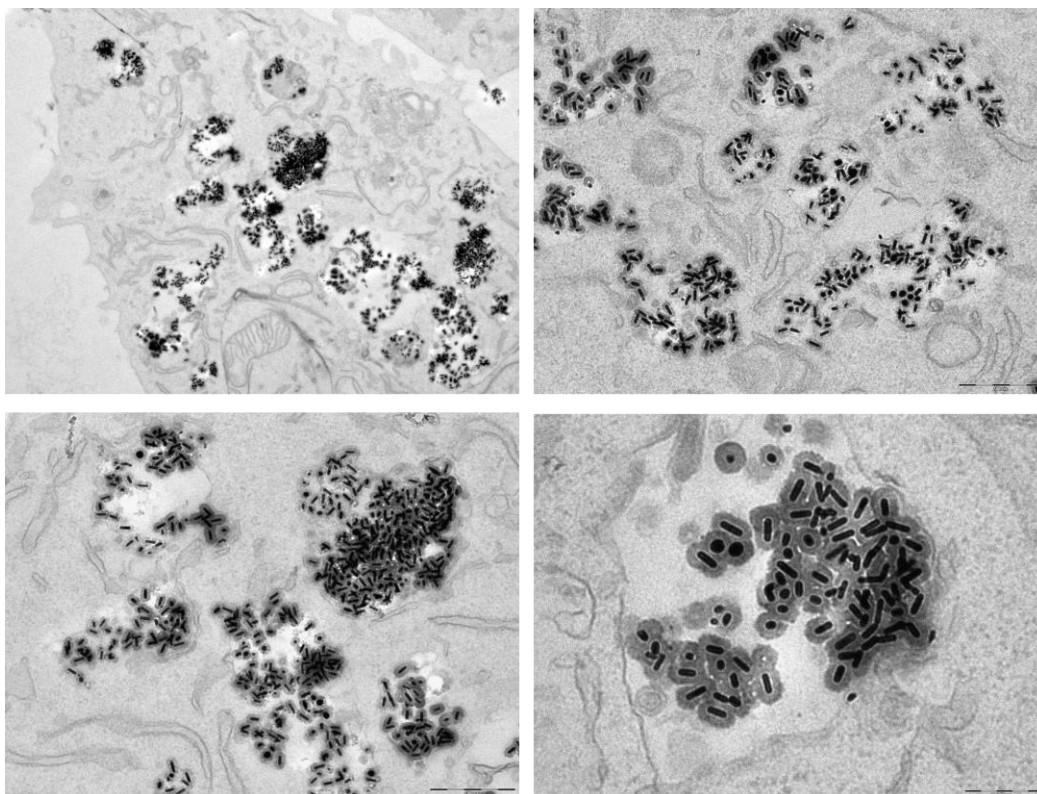

## Supplementary material

**Supplementary file 1. Additional images of GNR-710 and GNR-860 uptake by MSCs.** Silica shell provided steric hindrance to minimise plasmon coupling effects.

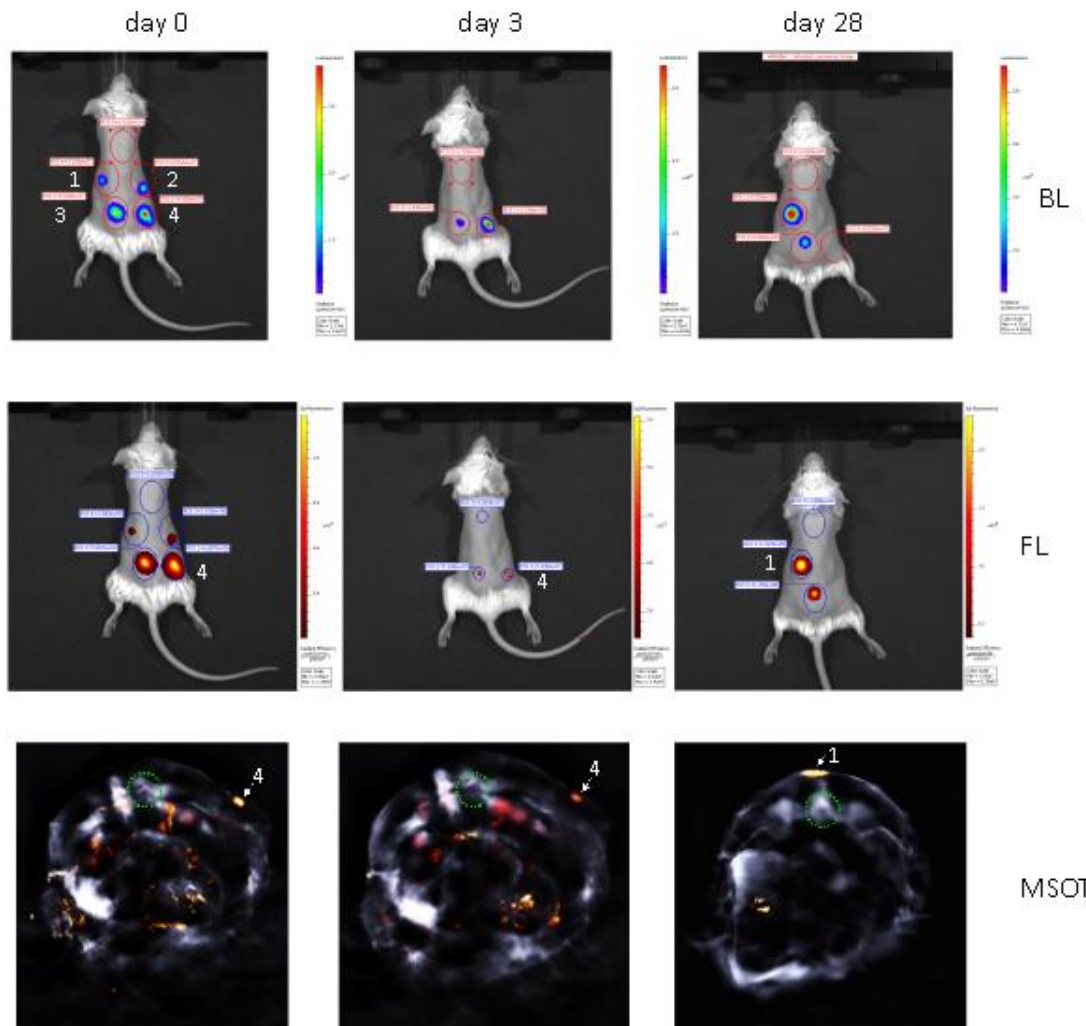

**Supplementary File 2. Longitudinal multi-modal imaging of iRFP720-E2A-Luc labelled cells after subcutaneous injection of mMSCs shows proportionality of bioluminescent, fluorescent and photoacoustic signals of the reporter genes.**  $1.25 \times 10^5$  (1),  $2.5 \times 10^5$  (2),  $5 \times 10^5$  (3) and  $1 \times 10^6$  (4) cells were injected at the indicated regions and imaged immediately and over a period of one month after injection. A substantial loss of signal intensity over the first few days post-injection, which can be attributed to cell death, resulted in undetectability of the  $1.25 \times 10^5$  (1) and  $2.5 \times 10^5$  (2) cell injection clusters on day 3. However, survival of a small number of cells and subsequent tumour formation in the region of the lowest injected cell number (1) is evident after four weeks. Photoacoustic (MSOT) detection of iRFP720 is shown in tomographic transverse body sections at the site of highest cell concentration ( $1 \times 10^6$ , (4)) on the day of injection and on day 3, and for the larger tumour (1) on day 28. The photoacoustic signals are colour coded in arbitrary MSOT units and the green circle indicates the location of the spine for orientation. For iRFP720 fluorescence (FL) the 710/760 nm excitation/emission filter set was used. Exposure time was 1 second for both, FL and bioluminescence (BL). Multi-spectral data reconstruction for

## **Supplementary material**

MSOT was performed employing a guided-ICA algorithm against the photoacoustic spectra of iRFP720-E2A-Luc cells in phantoms.

## **Supplementary material**

**Supplementary File 3. 360° animation of the 3D reconstruction shown in Figure 3 of the main text.**

(supplementary file 3.avi)

## Supplementary material

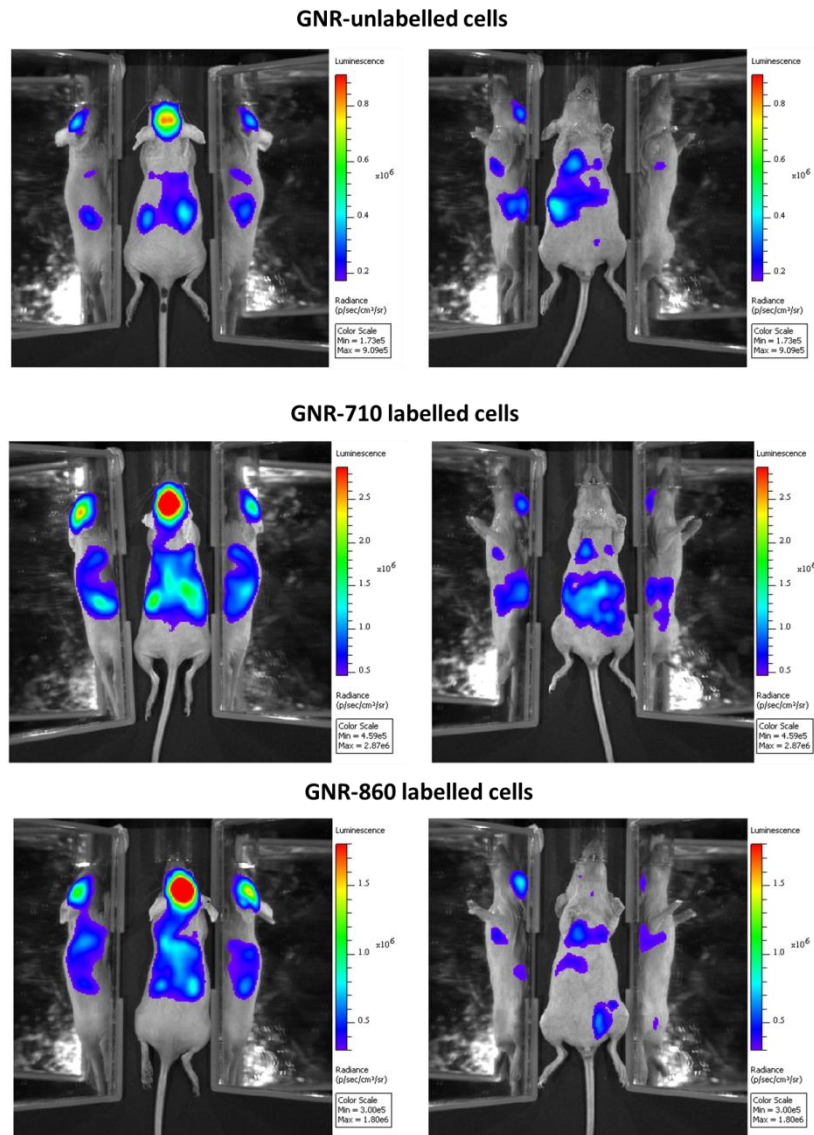

**Supplementary File 4. Biodistribution of cells not labelled with GNRs and cells labelled with GNR-710 and GNR-860, respectively, after intracardiac administration. A similar pattern was observed in all three cases, showing that GNRs did not affect overall cell distribution.**



## Supplementary material

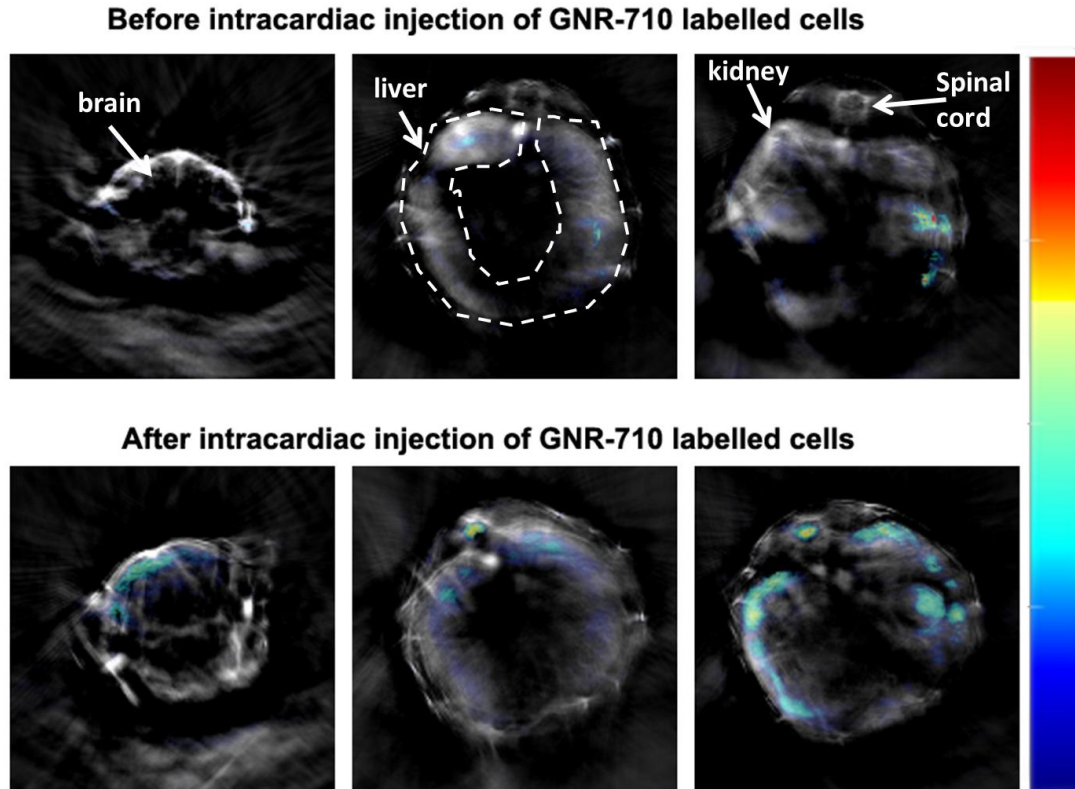

### Supplementary File 5. MSOT imaging of cell biodistribution of GNR-710 labelled cells.

Transverse sections showing three regions of interest (brain, liver/spinal cord and kidneys) before and after the administration of cells. The results here are in agreement with the results for GNR-860 in the main text Figure 3. Colour scale is 0.8 to 25 MSOT intensity (a.u.). Note also that for GNR-710, we observed signal interferences in the intestines. This interference is likely due to a similar photoacoustic profile of food since this signal appeared also before the administration of cells, which helped to discriminate between interference and actual signal originating from GNRs.

## Supplementary material

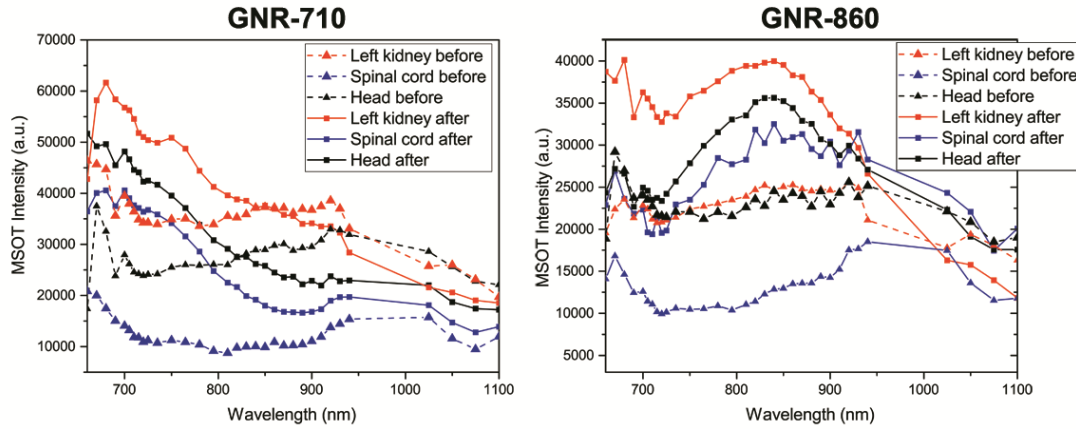

**Supplementary File 6. Photoacoustic spectra extracted from *in vivo* imaging.** Photoacoustic spectra of three regions of interest (left kidney, spinal cord and head) before and after administration of GNR-710-labeled cells (left) and GNR-860-labeled cells (right). Note that the spectra corresponding to the scans before cell administration are similar in both cases, whilst they acquire the characteristic profile of their corresponding GNRs after cell administration. No wavelengths between 940 and 1025 were selected to avoid absorption by water, which has one absorption band in this region.

## Supplementary material



## Supplementary material

|                  | Total BLI<br>(day 0)<br>( $\rho \cdot s^{-1} \cdot cm^{-2} \cdot sr^{-1}$ ) | Total BLI<br>(day 1)<br>( $\rho \cdot s^{-1} \cdot cm^{-2} \cdot sr^{-1}$ ) | remaining<br>signal<br>(%) |
|------------------|-----------------------------------------------------------------------------|-----------------------------------------------------------------------------|----------------------------|
| <b>control-1</b> | 7,01E+07                                                                    | 1,00E+07                                                                    | 14,3                       |
| <b>control-2</b> | 3,68E+07                                                                    | 1,10E+07                                                                    | 29,9                       |
| <b>GNR 860-1</b> | 5,60E+07                                                                    | 8,62E+06                                                                    | 15,4                       |
| <b>GNR 860-2</b> | 3,56E+07                                                                    | 8,03E+06                                                                    | 22,6                       |
| <b>GNR-860-3</b> | 1,75E+07                                                                    | 2,75E+06                                                                    | 15,7                       |

**Supplementary File 7. Loss in BLI signal intensity within 24 hours after injection.** A similar percentage of decrease in total BLI signal intensity was observed in mice treated with GNR-unlabelled cells as in mice treated with GNR-860-labelled cells, suggesting that GNRs did not affect cell death.

## Supplementary material

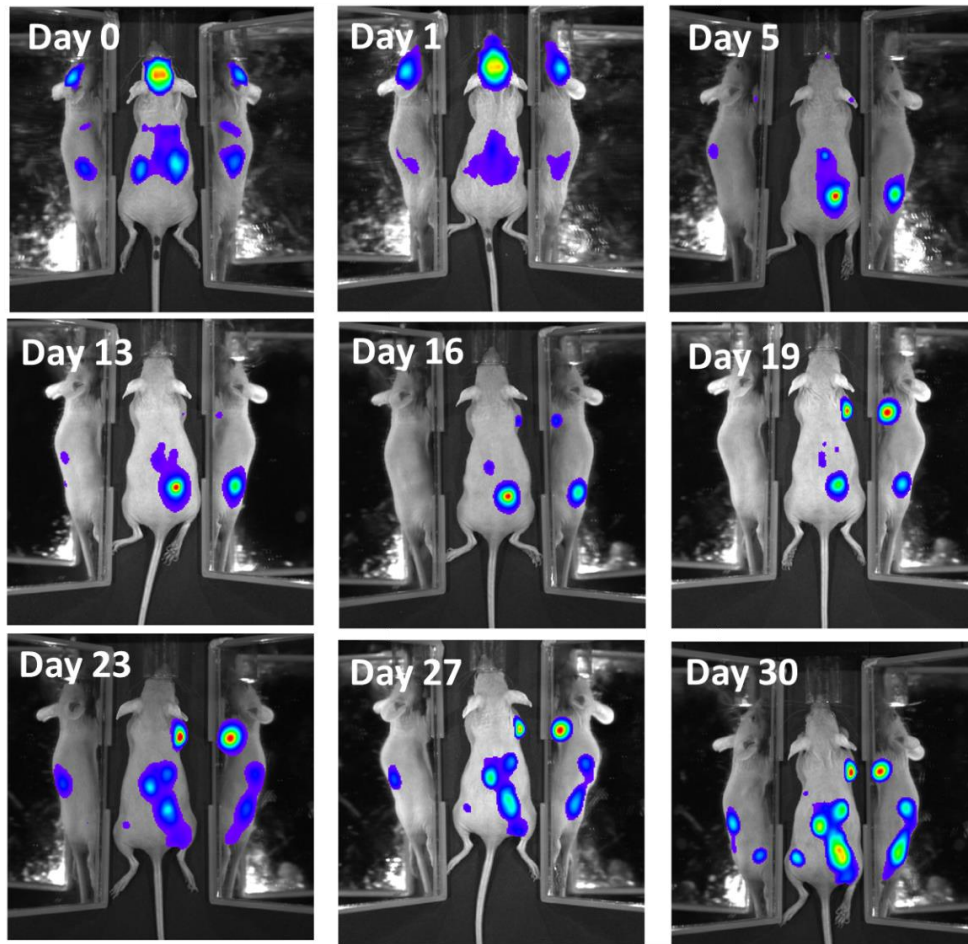

### COLOUR SCALES VALUES:

|               | Minimum<br>( $\rho \cdot \text{s}^{-1} \cdot \text{cm}^{-2} \cdot \text{sr}^{-1}$ ) | Maximum<br>( $\rho \cdot \text{s}^{-1} \cdot \text{cm}^{-2} \cdot \text{sr}^{-1}$ ) |
|---------------|-------------------------------------------------------------------------------------|-------------------------------------------------------------------------------------|
| <b>Day 0</b>  | $1.7 \times 10^5$                                                                   | $9.1 \times 10^5$                                                                   |
| <b>Day 1</b>  | $3.5 \times 10^4$                                                                   | $5.7 \times 10^5$                                                                   |
| <b>Day 5</b>  | $7.2 \times 10^3$                                                                   | $1.3 \times 10^5$                                                                   |
| <b>Day 13</b> | $4.3 \times 10^5$                                                                   | $1.9 \times 10^7$                                                                   |
| <b>Day 16</b> | $3.0 \times 10^6$                                                                   | $4.3 \times 10^7$                                                                   |
| <b>Day 19</b> | $7.5 \times 10^6$                                                                   | $1.1 \times 10^8$                                                                   |
| <b>Day 23</b> | $1.3 \times 10^7$                                                                   | $3.9 \times 10^8$                                                                   |
| <b>Day 27</b> | $6.0 \times 10^7$                                                                   | $5.5 \times 10^8$                                                                   |
| <b>Day 30</b> | $8.0 \times 10^7$                                                                   | $6.1 \times 10^8$                                                                   |

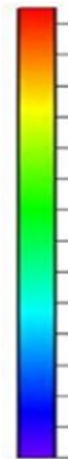

**Supplementary File 8. Bioluminescence monitoring of tumour growth of the mouse shown in Figures 6 and 7 of the main text.** Several tumours developed and became detectable from five days after cell injection. Colour scales have been adjusted to show tumour localisation. They cannot be standardized here due to the great increase of intensity after tumour growth.

## Supplementary material

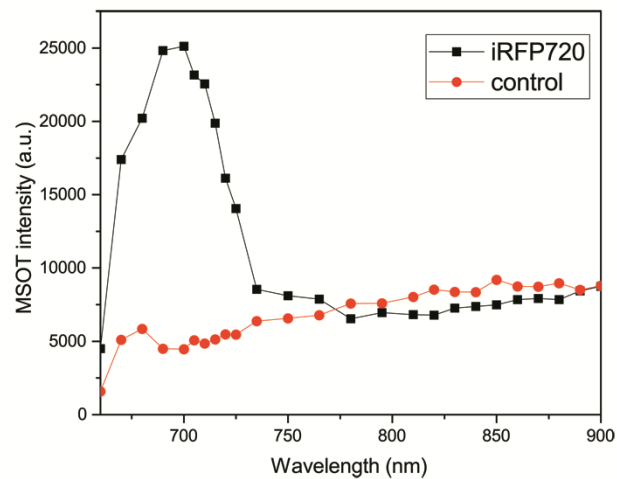

**Supplementary File 9. *In vivo* photoacoustic spectra of tumour 2b in Figure 6 of the main text.** The characteristic spectrum of iRFP720 is obtained after analysing the photoacoustic intensities at the working wavelengths. A random region below the tumour was chosen as a control region for comparison.

## Supplementary material

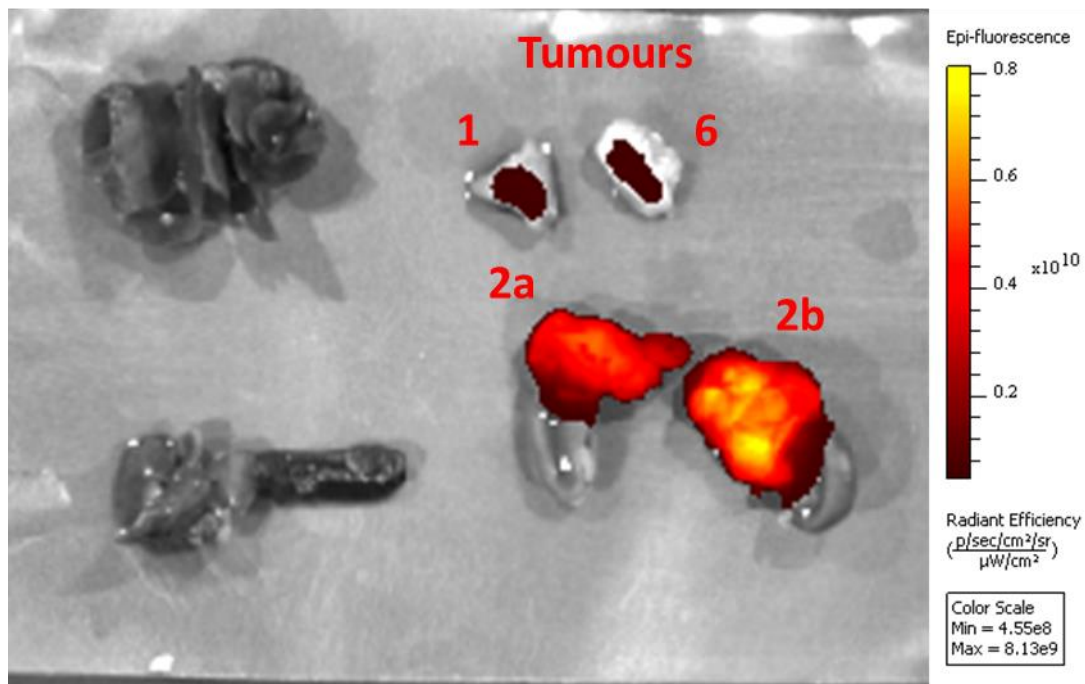

**Supplementary File 10.** *Ex vivo* epi-fluorescence image (Ex=675 nm, Em=720 nm) of tumours shown in Figure 6, after fixation with 4% PFA for 24 hours. No signal was observed in organs such as liver (top left), stomach and attached spleen (bottom left), and heart and lungs, indicating the specificity of the signal.

## Supplementary material

## Supplementary material

**Supplementary File 11. 360° animation of the 3D reconstructions shown in Figure 7 of the main text.**

(supplementary file 11.pptx)

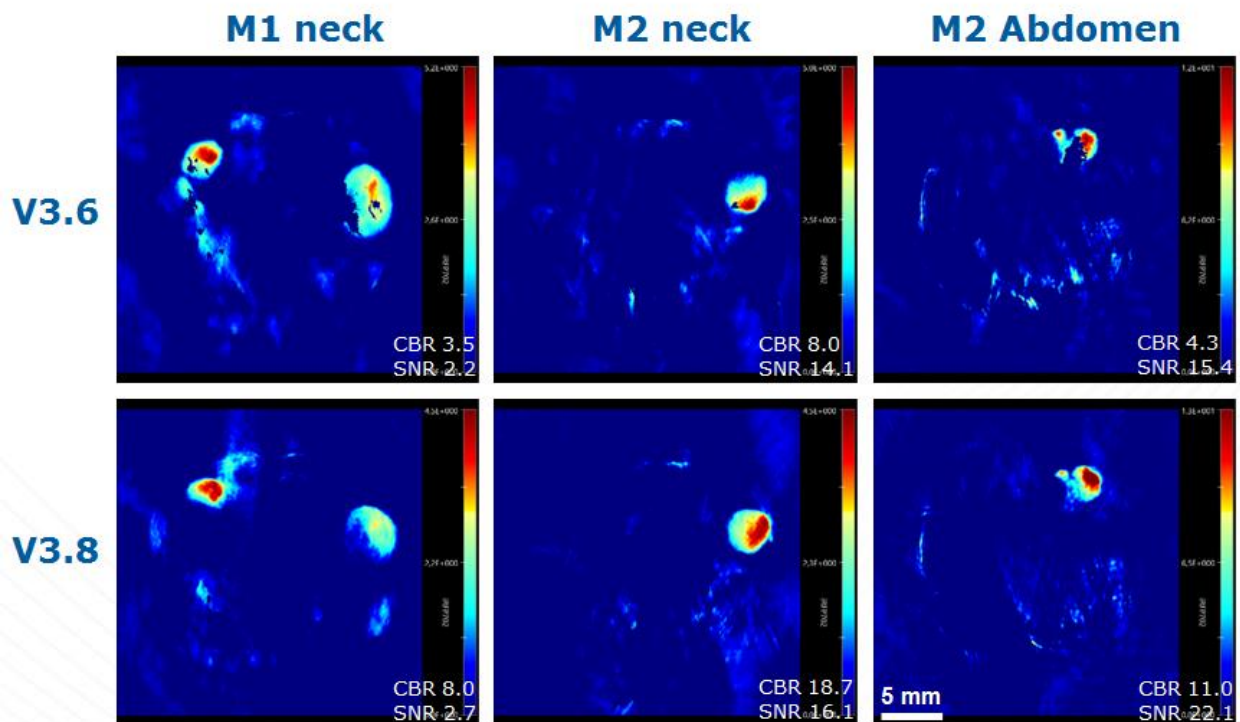

**Supplementary File 12.** The negative areas in the reconstructed MSOT images (appearing as black pixels in some of our figures) have a variety of origins. For all of the figures of this article, v3.6 of the MSOT software was used. v3.8 has now been released. It includes a better model for the receive characteristics of the transducer that reduces the number of negative pixels as can be seen above. Thank you to Stefan Morscher and Thomas Sardella of iTheraMedical for helpful discussion and providing the figure above. M1 is mouse GNR-860 (group III in table 1 of the main ms) and M2 is a control mouse (group I in table 1 of the main ms).
